# Supplementary material for: Strain-induced mechanoresponse depends on cell contractility and BAG3-mediated autophagy
Source: PubMed Central journal article supplement — Mol Biol Cell. 2021 Oct 1;32(20):ar9. doi: 10.1091/mbc.E21-05-0254 (PMC8684750; doi:10.1091/mbc.e21-05-0254), 2021-10-01

# Supplemental Materials

Molecular Biology of the Cell

Lövenich *et al.*

## Supplementary Information

**Supplementary Figure S5:** Estimation of confidence intervals. Angles for actin reorientation for all indicated conditions and cell types shown in Figure 3, 4, 5, 6, 7 and Supplementary Figure S1, S2 and S3 were statistically analyzed by using the method for bias-corrected and accelerated bootstrap intervals. Bootstrap sample size was set to 5000 based on the investigated high number of cells which is indicated by n for each sample. Estimated upper and lower 95% confidence intervals and cumulated frequencies are given for classes of 5° each from 5° to 90°.

**Table S1. Estimation of the 95% confidence intervals (CI95) for cumulative histograms in Fig. 3**

| <b>A7r5 unstretched untreated (n=292)</b> |            |                |            | <b>A7r5 30 min stretched untreated (n=254)</b> |            |                |            |
|-------------------------------------------|------------|----------------|------------|------------------------------------------------|------------|----------------|------------|
| Class                                     | Lower CI95 | Cum. Frequency | Upper CI95 | Class                                          | Lower CI95 | Cum. Frequency | Upper CI95 |
| 5                                         | 0,027      | 0,051          | 0,079      | 5                                              | 0          | 0,0039         | 0,016      |
| 10                                        | 0,062      | 0,092          | 0,13       | 10                                             | 0          | 0,0039         | 0,016      |
| 15                                        | 0,10       | 0,13           | 0,17       | 15                                             | 0          | 0,0039         | 0,016      |
| 20                                        | 0,15       | 0,20           | 0,24       | 20                                             | 0          | 0,0039         | 0,016      |
| 25                                        | 0,20       | 0,25           | 0,30       | 25                                             | 0          | 0,0079         | 0,024      |
| 30                                        | 0,24       | 0,29           | 0,35       | 30                                             | 0          | 0,0079         | 0,024      |
| 35                                        | 0,34       | 0,40           | 0,46       | 35                                             | 0,0039     | 0,016          | 0,035      |
| 40                                        | 0,38       | 0,44           | 0,49       | 40                                             | 0,0039     | 0,020          | 0,039      |
| 45                                        | 0,42       | 0,49           | 0,54       | 45                                             | 0,012      | 0,031          | 0,055      |
| 50                                        | 0,49       | 0,55           | 0,60       | 50                                             | 0,035      | 0,063          | 0,094      |
| 55                                        | 0,54       | 0,60           | 0,65       | 55                                             | 0,083      | 0,12           | 0,16       |
| 60                                        | 0,59       | 0,64           | 0,70       | 60                                             | 0,15       | 0,19           | 0,24       |
| 65                                        | 0,65       | 0,70           | 0,75       | 65                                             | 0,31       | 0,37           | 0,43       |
| 70                                        | 0,73       | 0,78           | 0,82       | 70                                             | 0,51       | 0,57           | 0,63       |
| 75                                        | 0,78       | 0,83           | 0,87       | 75                                             | 0,67       | 0,72           | 0,78       |
| 80                                        | 0,88       | 0,92           | 0,95       | 80                                             | 0,77       | 0,81           | 0,86       |
| 85                                        | 0,91       | 0,94           | 0,97       | 85                                             | 0,85       | 0,89           | 0,93       |
| 90                                        | 1          | 1              | 1          | 90                                             | 1          | 1              | 1          |

  

| <b>A7r5 1 h stretched untreated (n=259)</b> |            |                |            | <b>A7r5 4 h stretched untreated (n=244)</b> |            |                |            |
|---------------------------------------------|------------|----------------|------------|---------------------------------------------|------------|----------------|------------|
| Class                                       | Lower CI95 | Cum. Frequency | Upper CI95 | Class                                       | Lower CI95 | Cum. Frequency | Upper CI95 |
| 5                                           | 0          | 0              | 0          | 5                                           | 0          | 0              | 0          |
| 10                                          | 0          | 0              | 0          | 10                                          | 0          | 0              | 0          |
| 15                                          | 0          | 0              | 0          | 15                                          | 0          | 0              | 0          |
| 20                                          | 0          | 0              | 0          | 20                                          | 0          | 0              | 0          |
| 25                                          | 0          | 0,0039         | 0,015      | 25                                          | 0          | 0              | 0          |
| 30                                          | 0          | 0,0077         | 0,023      | 30                                          | 0          | 0              | 0          |
| 35                                          | 0          | 0,0077         | 0,023      | 35                                          | 0          | 0              | 0          |
| 40                                          | 0          | 0,0077         | 0,023      | 40                                          | 0          | 0              | 0          |
| 45                                          | 0          | 0,012          | 0,027      | 45                                          | 0          | 0              | 0          |
| 50                                          | 0,0039     | 0,015          | 0,035      | 50                                          | 0          | 0              | 0          |
| 55                                          | 0,012      | 0,031          | 0,054      | 55                                          | 0          | 0              | 0          |
| 60                                          | 0,050      | 0,081          | 0,12       | 60                                          | 0          | 0,0082         | 0,025      |
| 65                                          | 0,16       | 0,21           | 0,26       | 65                                          | 0,0041     | 0,016          | 0,037      |
| 70                                          | 0,31       | 0,36           | 0,42       | 70                                          | 0,049      | 0,078          | 0,11       |
| 75                                          | 0,53       | 0,59           | 0,65       | 75                                          | 0,15       | 0,20           | 0,25       |
| 80                                          | 0,70       | 0,76           | 0,80       | 80                                          | 0,34       | 0,41           | 0,47       |
| 85                                          | 0,84       | 0,89           | 0,92       | 85                                          | 0,64       | 0,70           | 0,76       |
| 90                                          | 1          | 1              | 1          | 90                                          | 1          | 1              | 1          |

| <b>A7r5 6 h stretched untreated (n=203)</b> |            |                |            | <b>A7r5 30 min stretched +CQ (n=249)</b> |            |                |            |
|---------------------------------------------|------------|----------------|------------|------------------------------------------|------------|----------------|------------|
| Class                                       | Lower CI95 | Cum. Frequency | Upper CI95 | Class                                    | Lower CI95 | Cum. Frequency | Upper CI95 |
| 5                                           | 0          | 0              | 0          | 5                                        | 0          | 0,0080         | 0,020      |
| 10                                          | 0          | 0              | 0          | 10                                       | 0,0040     | 0,016          | 0,036      |
| 15                                          | 0          | 0              | 0          | 15                                       | 0,0040     | 0,020          | 0,040      |
| 20                                          | 0          | 0              | 0          | 20                                       | 0,0080     | 0,024          | 0,048      |
| 25                                          | 0          | 0              | 0          | 25                                       | 0,020      | 0,036          | 0,064      |
| 30                                          | 0          | 0              | 0          | 30                                       | 0,036      | 0,060          | 0,10       |
| 35                                          | 0          | 0              | 0          | 35                                       | 0,040      | 0,068          | 0,10       |
| 40                                          | 0          | 0              | 0          | 40                                       | 0,060      | 0,092          | 0,13       |
| 45                                          | 0          | 0              | 0          | 45                                       | 0,084      | 0,12           | 0,17       |
| 50                                          | 0          | 0              | 0          | 50                                       | 0,16       | 0,21           | 0,27       |
| 55                                          | 0          | 0              | 0          | 55                                       | 0,28       | 0,34           | 0,40       |
| 60                                          | 0          | 0              | 0          | 60                                       | 0,38       | 0,44           | 0,50       |
| 65                                          | 0          | 0              | 0          | 65                                       | 0,52       | 0,58           | 0,64       |
| 70                                          | 0,0049     | 0,025          | 0,049      | 70                                       | 0,65       | 0,70           | 0,76       |
| 75                                          | 0,11       | 0,15           | 0,21       | 75                                       | 0,73       | 0,78           | 0,84       |
| 80                                          | 0,29       | 0,35           | 0,42       | 80                                       | 0,80       | 0,85           | 0,89       |
| 85                                          | 0,56       | 0,62           | 0,68       | 85                                       | 0,88       | 0,92           | 0,95       |
| 90                                          | 1          | 1              | 1          | 90                                       | 1          | 1              | 1          |

  

| <b>A7r5 1 h stretched +CQ (n=255)</b> |            |                |            | <b>A7r5 6 h stretched +CQ (n=199)</b> |            |                |            |
|---------------------------------------|------------|----------------|------------|---------------------------------------|------------|----------------|------------|
| Class                                 | Lower CI95 | Cum. Frequency | Upper CI95 | Class                                 | Lower CI95 | Cum. Frequency | Upper CI95 |
| 5                                     | 0          | 0              | 0          | 5                                     | 0          | 0              | 0          |
| 10                                    | 0          | 0              | 0          | 10                                    | 0          | 0              | 0          |
| 15                                    | 0          | 0              | 0          | 15                                    | 0          | 0,0050         | 0,020      |
| 20                                    | 0          | 0              | 0          | 20                                    | 0          | 0,0050         | 0,020      |
| 25                                    | 0          | 0,0039         | 0,016      | 25                                    | 0          | 0,0050         | 0,020      |
| 30                                    | 0          | 0,012          | 0,027      | 30                                    | 0          | 0,0050         | 0,020      |
| 35                                    | 0,0039     | 0,020          | 0,039      | 35                                    | 0          | 0,015          | 0,035      |
| 40                                    | 0,027      | 0,051          | 0,082      | 40                                    | 0,0050     | 0,020          | 0,045      |
| 45                                    | 0,043      | 0,075          | 0,11       | 45                                    | 0,015      | 0,035          | 0,065      |
| 50                                    | 0,11       | 0,15           | 0,20       | 50                                    | 0,045      | 0,080          | 0,13       |
| 55                                    | 0,21       | 0,26           | 0,32       | 55                                    | 0,085      | 0,13           | 0,18       |
| 60                                    | 0,35       | 0,41           | 0,47       | 60                                    | 0,14       | 0,19           | 0,25       |
| 65                                    | 0,51       | 0,57           | 0,64       | 65                                    | 0,24       | 0,30           | 0,37       |
| 70                                    | 0,62       | 0,68           | 0,74       | 70                                    | 0,38       | 0,44           | 0,51       |
| 75                                    | 0,69       | 0,75           | 0,80       | 75                                    | 0,47       | 0,53           | 0,61       |
| 80                                    | 0,80       | 0,85           | 0,89       | 80                                    | 0,63       | 0,69           | 0,76       |
| 85                                    | 0,86       | 0,90           | 0,93       | 85                                    | 0,76       | 0,81           | 0,87       |
| 90                                    | 1          | 1              | 1          | 90                                    | 1          | 1              | 1          |

| <b>A7r5 30 min stretched +MG132 (n=256)</b> |            |                |            |
|---------------------------------------------|------------|----------------|------------|
| Class                                       | Lower CI95 | Cum. Frequency | Upper CI95 |
| 5                                           | 0          | 0              | 0          |
| 10                                          | 0          | 0              | 0          |
| 15                                          | 0          | 0,0039         | 0,016      |
| 20                                          | 0          | 0,0039         | 0,016      |
| 25                                          | 0,0039     | 0,016          | 0,031      |
| 30                                          | 0,0039     | 0,020          | 0,039      |
| 35                                          | 0,012      | 0,027          | 0,051      |
| 40                                          | 0,020      | 0,039          | 0,066      |
| 45                                          | 0,039      | 0,066          | 0,10       |
| 50                                          | 0,070      | 0,11           | 0,14       |
| 55                                          | 0,12       | 0,16           | 0,21       |
| 60                                          | 0,23       | 0,28           | 0,34       |
| 65                                          | 0,45       | 0,51           | 0,57       |
| 70                                          | 0,60       | 0,66           | 0,72       |
| 75                                          | 0,70       | 0,75           | 0,80       |
| 80                                          | 0,78       | 0,82           | 0,87       |
| 85                                          | 0,85       | 0,89           | 0,92       |
| 90                                          | 1          | 1              | 1          |

| <b>A7r5 1 h stretched +MG132 (n=256)</b> |            |                |            |
|------------------------------------------|------------|----------------|------------|
| Class                                    | Lower CI95 | Cum. Frequency | Upper CI95 |
| 5                                        | 0          | 0              | 0          |
| 10                                       | 0          | 0              | 0          |
| 15                                       | 0          | 0              | 0          |
| 20                                       | 0          | 0              | 0          |
| 25                                       | 0          | 0              | 0          |
| 30                                       | 0          | 0              | 0          |
| 35                                       | 0          | 0              | 0          |
| 40                                       | 0          | 0              | 0          |
| 45                                       | 0          | 0,012          | 0,027      |
| 50                                       | 0,0078     | 0,023          | 0,043      |
| 55                                       | 0,020      | 0,043          | 0,070      |
| 60                                       | 0,047      | 0,074          | 0,11       |
| 65                                       | 0,13       | 0,18           | 0,23       |
| 70                                       | 0,32       | 0,38           | 0,44       |
| 75                                       | 0,57       | 0,63           | 0,69       |
| 80                                       | 0,73       | 0,78           | 0,82       |
| 85                                       | 0,85       | 0,89           | 0,93       |
| 90                                       | 1          | 1              | 1          |

| <b>A7r5 6 h stretched +MG132 (n=219)</b> |            |                |            |
|------------------------------------------|------------|----------------|------------|
| Class                                    | Lower CI95 | Cum. Frequency | Upper CI95 |
| 5                                        | 0          | 0              | 0          |
| 10                                       | 0          | 0              | 0          |
| 15                                       | 0          | 0              | 0          |
| 20                                       | 0          | 0              | 0          |
| 25                                       | 0          | 0              | 0          |
| 30                                       | 0          | 0              | 0          |
| 35                                       | 0          | 0              | 0          |
| 40                                       | 0          | 0              | 0          |
| 45                                       | 0          | 0              | 0          |
| 50                                       | 0          | 0              | 0          |
| 55                                       | 0          | 0              | 0          |
| 60                                       | 0          | 0              | 0          |
| 65                                       | 0          | 0,0046         | 0,018      |
| 70                                       | 0          | 0,014          | 0,032      |
| 75                                       | 0,078      | 0,12           | 0,16       |
| 80                                       | 0,28       | 0,34           | 0,41       |
| 85                                       | 0,53       | 0,60           | 0,66       |
| 90                                       | 1          | 1              | 1          |

| <b>A7r5 30 min stretched +CQ +MG132 (n=257)</b> |            |                |            |
|-------------------------------------------------|------------|----------------|------------|
| Class                                           | Lower CI95 | Cum. Frequency | Upper CI95 |
| 5                                               | 0          | 0              | 0          |
| 10                                              | 0          | 0,0078         | 0,019      |
| 15                                              | 0,016      | 0,035          | 0,058      |
| 20                                              | 0,023      | 0,047          | 0,074      |
| 25                                              | 0,039      | 0,066          | 0,10       |
| 30                                              | 0,054      | 0,086          | 0,12       |
| 35                                              | 0,078      | 0,12           | 0,16       |
| 40                                              | 0,11       | 0,15           | 0,19       |
| 45                                              | 0,17       | 0,21           | 0,27       |
| 50                                              | 0,25       | 0,30           | 0,37       |
| 55                                              | 0,37       | 0,43           | 0,49       |
| 60                                              | 0,53       | 0,58           | 0,64       |
| 65                                              | 0,66       | 0,72           | 0,77       |
| 70                                              | 0,76       | 0,81           | 0,85       |
| 75                                              | 0,83       | 0,87           | 0,91       |
| 80                                              | 0,86       | 0,90           | 0,94       |
| 85                                              | 0,90       | 0,93           | 0,96       |
| 90                                              | 1          | 1              | 1          |

| <b>A7r5 1 h stretched +CQ +MG132 (n=252)</b> |            |                |            | <b>A7r5 6 h stretched +CQ +MG132 (n=187)</b> |            |                |            |
|----------------------------------------------|------------|----------------|------------|----------------------------------------------|------------|----------------|------------|
| Class                                        | Lower CI95 | Cum. Frequency | Upper CI95 | Class                                        | Lower CI95 | Cum. Frequency | Upper CI95 |
| 5                                            | 0          | 0              | 0          | 5                                            | 0          | 0              | 0          |
| 10                                           | 0          | 0              | 0          | 10                                           | 0          | 0              | 0          |
| 15                                           | 0          | 0              | 0          | 15                                           | 0          | 0              | 0          |
| 20                                           | 0          | 0              | 0          | 20                                           | 0          | 0              | 0          |
| 25                                           | 0          | 0,0079         | 0,020      | 25                                           | 0          | 0              | 0          |
| 30                                           | 0          | 0,012          | 0,028      | 30                                           | 0          | 0,0053         | 0,021      |
| 35                                           | 0,012      | 0,032          | 0,056      | 35                                           | 0          | 0,016          | 0,037      |
| 40                                           | 0,028      | 0,052          | 0,083      | 40                                           | 0,0053     | 0,027          | 0,048      |
| 45                                           | 0,052      | 0,083          | 0,12       | 45                                           | 0,0053     | 0,027          | 0,048      |
| 50                                           | 0,11       | 0,15           | 0,19       | 50                                           | 0,021      | 0,048          | 0,080      |
| 55                                           | 0,19       | 0,25           | 0,30       | 55                                           | 0,059      | 0,10           | 0,14       |
| 60                                           | 0,35       | 0,41           | 0,47       | 60                                           | 0,11       | 0,16           | 0,21       |
| 65                                           | 0,52       | 0,58           | 0,64       | 65                                           | 0,20       | 0,26           | 0,33       |
| 70                                           | 0,64       | 0,70           | 0,75       | 70                                           | 0,35       | 0,42           | 0,49       |
| 75                                           | 0,73       | 0,78           | 0,83       | 75                                           | 0,50       | 0,58           | 0,64       |
| 80                                           | 0,82       | 0,87           | 0,91       | 80                                           | 0,64       | 0,71           | 0,76       |
| 85                                           | 0,87       | 0,91           | 0,94       | 85                                           | 0,73       | 0,79           | 0,84       |
| 90                                           | 1          | 1              | 1          | 90                                           | 1          | 1              | 1          |

The lower and upper 95% confidence intervals were analyzed using the method for bias-corrected and accelerated bootstrap intervals. The number of bootstrap intervals was set to 5000 for all histograms based on the indicated high number of cells (n). Cum. Frequency results from mean of upper and lower CI95.

**Table S2. Estimation of the 95% confidence intervals (CI95) for cumulative histograms in Fig. 4**

| <b>MEF unstretched untreated (n=336)</b> |            |                |            | <b>MEF 10 min stretched untreated (n=280)</b> |            |                |            |
|------------------------------------------|------------|----------------|------------|-----------------------------------------------|------------|----------------|------------|
| Class                                    | Lower CI95 | Cum. Frequency | Upper CI95 | Class                                         | Lower CI95 | Cum. Frequency | Upper CI95 |
| 5                                        | 0,036      | 0,060          | 0,086      | 5                                             | 0          | 0,011          | 0,025      |
| 10                                       | 0,065      | 0,10           | 0,13       | 10                                            | 0,014      | 0,032          | 0,054      |
| 15                                       | 0,10       | 0,14           | 0,17       | 15                                            | 0,021      | 0,046          | 0,071      |
| 20                                       | 0,13       | 0,17           | 0,21       | 20                                            | 0,032      | 0,061          | 0,089      |
| 25                                       | 0,17       | 0,21           | 0,26       | 25                                            | 0,043      | 0,071          | 0,10       |
| 30                                       | 0,21       | 0,26           | 0,30       | 30                                            | 0,057      | 0,089          | 0,12       |
| 35                                       | 0,25       | 0,30           | 0,35       | 35                                            | 0,075      | 0,11           | 0,15       |
| 40                                       | 0,29       | 0,34           | 0,39       | 40                                            | 0,10       | 0,14           | 0,18       |
| 45                                       | 0,34       | 0,39           | 0,44       | 45                                            | 0,13       | 0,18           | 0,22       |
| 50                                       | 0,39       | 0,44           | 0,49       | 50                                            | 0,18       | 0,23           | 0,28       |
| 55                                       | 0,42       | 0,47           | 0,52       | 55                                            | 0,22       | 0,27           | 0,32       |
| 60                                       | 0,48       | 0,54           | 0,59       | 60                                            | 0,28       | 0,33           | 0,39       |
| 65                                       | 0,53       | 0,59           | 0,64       | 65                                            | 0,44       | 0,50           | 0,55       |
| 70                                       | 0,60       | 0,65           | 0,70       | 70                                            | 0,57       | 0,63           | 0,68       |
| 75                                       | 0,68       | 0,72           | 0,77       | 75                                            | 0,66       | 0,71           | 0,77       |
| 80                                       | 0,74       | 0,78           | 0,82       | 80                                            | 0,75       | 0,80           | 0,85       |
| 85                                       | 0,84       | 0,87           | 0,91       | 85                                            | 0,85       | 0,89           | 0,92       |
| 90                                       | 1          | 1              | 1          | 90                                            | 1          | 1              | 1          |

  

| <b>MEF 30 min stretched untreated (n=437)</b> |            |                |            | <b>MEF 1 h stretched untreated (n=396)</b> |            |                |            |
|-----------------------------------------------|------------|----------------|------------|--------------------------------------------|------------|----------------|------------|
| Class                                         | Lower CI95 | Cum. Frequency | Upper CI95 | Class                                      | Lower CI95 | Cum. Frequency | Upper CI95 |
| 5                                             | 0          | 0              | 0          | 5                                          | 0,0051     | 0,015          | 0,028      |
| 10                                            | 0          | 0,0069         | 0,016      | 10                                         | 0,0076     | 0,018          | 0,033      |
| 15                                            | 0,009      | 0,021          | 0,037      | 15                                         | 0,0076     | 0,020          | 0,033      |
| 20                                            | 0,011      | 0,023          | 0,039      | 20                                         | 0,013      | 0,028          | 0,043      |
| 25                                            | 0,014      | 0,027          | 0,043      | 25                                         | 0,023      | 0,040          | 0,061      |
| 30                                            | 0,027      | 0,046          | 0,066      | 30                                         | 0,030      | 0,051          | 0,073      |
| 35                                            | 0,032      | 0,053          | 0,076      | 35                                         | 0,038      | 0,061          | 0,086      |
| 40                                            | 0,046      | 0,069          | 0,094      | 40                                         | 0,043      | 0,066          | 0,091      |
| 45                                            | 0,057      | 0,082          | 0,11       | 45                                         | 0,063      | 0,086          | 0,12       |
| 50                                            | 0,076      | 0,10           | 0,13       | 50                                         | 0,091      | 0,12           | 0,15       |
| 55                                            | 0,092      | 0,12           | 0,15       | 55                                         | 0,11       | 0,14           | 0,18       |
| 60                                            | 0,14       | 0,18           | 0,21       | 60                                         | 0,13       | 0,16           | 0,20       |
| 65                                            | 0,20       | 0,24           | 0,28       | 65                                         | 0,18       | 0,21           | 0,26       |
| 70                                            | 0,31       | 0,35           | 0,40       | 70                                         | 0,27       | 0,32           | 0,36       |
| 75                                            | 0,47       | 0,52           | 0,57       | 75                                         | 0,37       | 0,42           | 0,47       |
| 80                                            | 0,61       | 0,66           | 0,70       | 80                                         | 0,53       | 0,58           | 0,63       |
| 85                                            | 0,75       | 0,79           | 0,83       | 85                                         | 0,70       | 0,75           | 0,79       |
| 90                                            | 1          | 1              | 1          | 90                                         | 1          | 1              | 1          |

| <b>MEF 10 min stretched +CQ (n=304)</b> |            |                |            |
|-----------------------------------------|------------|----------------|------------|
| Class                                   | Lower CI95 | Cum. Frequency | Upper CI95 |
| 5                                       | 0,0033     | 0,013          | 0,030      |
| 10                                      | 0,013      | 0,030          | 0,053      |
| 15                                      | 0,033      | 0,056          | 0,082      |
| 20                                      | 0,033      | 0,059          | 0,086      |
| 25                                      | 0,056      | 0,089          | 0,12       |
| 30                                      | 0,076      | 0,11           | 0,14       |
| 35                                      | 0,12       | 0,16           | 0,20       |
| 40                                      | 0,15       | 0,19           | 0,24       |
| 45                                      | 0,18       | 0,22           | 0,27       |
| 50                                      | 0,21       | 0,26           | 0,31       |
| 55                                      | 0,26       | 0,31           | 0,37       |
| 60                                      | 0,34       | 0,39           | 0,45       |
| 65                                      | 0,46       | 0,51           | 0,57       |
| 70                                      | 0,57       | 0,62           | 0,67       |
| 75                                      | 0,69       | 0,74           | 0,79       |
| 80                                      | 0,77       | 0,82           | 0,86       |
| 85                                      | 0,85       | 0,89           | 0,92       |
| 90                                      | 1          | 1              | 1          |

| <b>MEF 30 min stretched +CQ (n=287)</b> |            |                |            |
|-----------------------------------------|------------|----------------|------------|
| Class                                   | Lower CI95 | Cum. Frequency | Upper CI95 |
| 5                                       | 0          | 0,0067         | 0,016      |
| 10                                      | 0,0067     | 0,018          | 0,031      |
| 15                                      | 0,013      | 0,029          | 0,044      |
| 20                                      | 0,024      | 0,042          | 0,062      |
| 25                                      | 0,038      | 0,058          | 0,080      |
| 30                                      | 0,044      | 0,067          | 0,091      |
| 35                                      | 0,060      | 0,084          | 0,11       |
| 40                                      | 0,080      | 0,11           | 0,14       |
| 45                                      | 0,10       | 0,13           | 0,16       |
| 50                                      | 0,12       | 0,16           | 0,19       |
| 55                                      | 0,16       | 0,20           | 0,24       |
| 60                                      | 0,21       | 0,25           | 0,29       |
| 65                                      | 0,31       | 0,36           | 0,40       |
| 70                                      | 0,43       | 0,47           | 0,52       |
| 75                                      | 0,57       | 0,62           | 0,67       |
| 80                                      | 0,69       | 0,73           | 0,77       |
| 85                                      | 0,82       | 0,86           | 0,89       |
| 90                                      | 1          | 1              | 1          |

| <b>MEF 1 h stretched +CQ (n=270)</b> |            |                |            |
|--------------------------------------|------------|----------------|------------|
| Class                                | Lower CI95 | Cum. Frequency | Upper CI95 |
| 5                                    | 0          | 0,0044         | 0,011      |
| 10                                   | 0          | 0,0066         | 0,015      |
| 15                                   | 0,0022     | 0,011          | 0,022      |
| 20                                   | 0,013      | 0,026          | 0,042      |
| 25                                   | 0,026      | 0,042          | 0,064      |
| 30                                   | 0,037      | 0,057          | 0,081      |
| 35                                   | 0,048      | 0,070          | 0,095      |
| 40                                   | 0,059      | 0,081          | 0,11       |
| 45                                   | 0,075      | 0,10           | 0,13       |
| 50                                   | 0,090      | 0,12           | 0,15       |
| 55                                   | 0,13       | 0,16           | 0,19       |
| 60                                   | 0,16       | 0,19           | 0,23       |
| 65                                   | 0,22       | 0,26           | 0,30       |
| 70                                   | 0,29       | 0,34           | 0,38       |
| 75                                   | 0,42       | 0,46           | 0,51       |
| 80                                   | 0,56       | 0,60           | 0,65       |
| 85                                   | 0,73       | 0,77           | 0,80       |
| 90                                   | 1          | 1              | 1          |

| <b>MEF 10 min stretched +MG132 (n=451)</b> |            |                |            |
|--------------------------------------------|------------|----------------|------------|
| Class                                      | Lower CI95 | Cum. Frequency | Upper CI95 |
| 5                                          | 0,0070     | 0,021          | 0,042      |
| 10                                         | 0,010      | 0,024          | 0,045      |
| 15                                         | 0,017      | 0,035          | 0,059      |
| 20                                         | 0,028      | 0,049          | 0,077      |
| 25                                         | 0,038      | 0,066          | 0,10       |
| 30                                         | 0,049      | 0,080          | 0,11       |
| 35                                         | 0,080      | 0,11           | 0,16       |
| 40                                         | 0,11       | 0,15           | 0,20       |
| 45                                         | 0,15       | 0,19           | 0,24       |
| 50                                         | 0,21       | 0,26           | 0,31       |
| 55                                         | 0,28       | 0,34           | 0,39       |
| 60                                         | 0,34       | 0,40           | 0,46       |
| 65                                         | 0,46       | 0,52           | 0,57       |
| 70                                         | 0,55       | 0,61           | 0,67       |
| 75                                         | 0,65       | 0,70           | 0,75       |
| 80                                         | 0,74       | 0,79           | 0,83       |
| 85                                         | 0,83       | 0,87           | 0,91       |
| 90                                         | 1          | 1              | 1          |



| <b>MEF 30 min stretched +MG132 (n=428)</b> |            |                |            |
|--------------------------------------------|------------|----------------|------------|
| Class                                      | Lower CI95 | Cum. Frequency | Upper CI95 |
| 5                                          | 0,0023     | 0,012          | 0,023      |
| 10                                         | 0,016      | 0,033          | 0,051      |
| 15                                         | 0,028      | 0,047          | 0,070      |
| 20                                         | 0,037      | 0,056          | 0,082      |
| 25                                         | 0,049      | 0,072          | 0,10       |
| 30                                         | 0,054      | 0,079          | 0,11       |
| 35                                         | 0,068      | 0,10           | 0,13       |
| 40                                         | 0,086      | 0,12           | 0,15       |
| 45                                         | 0,12       | 0,15           | 0,19       |
| 50                                         | 0,14       | 0,18           | 0,21       |
| 55                                         | 0,19       | 0,23           | 0,27       |
| 60                                         | 0,23       | 0,27           | 0,31       |
| 65                                         | 0,32       | 0,37           | 0,42       |
| 70                                         | 0,43       | 0,48           | 0,53       |
| 75                                         | 0,58       | 0,62           | 0,67       |
| 80                                         | 0,70       | 0,75           | 0,78       |
| 85                                         | 0,84       | 0,87           | 0,90       |
| 90                                         | 1          | 1              | 1          |

| <b>MEF 1 h stretched +MG132 (n=438)</b> |            |                |            |
|-----------------------------------------|------------|----------------|------------|
| Class                                   | Lower CI95 | Cum. Frequency | Upper CI95 |
| 5                                       | 0,0047     | 0,014          | 0,028      |
| 10                                      | 0,0093     | 0,023          | 0,040      |
| 15                                      | 0,016      | 0,030          | 0,049      |
| 20                                      | 0,019      | 0,035          | 0,054      |
| 25                                      | 0,033      | 0,054          | 0,075      |
| 30                                      | 0,044      | 0,068          | 0,093      |
| 35                                      | 0,068      | 0,093          | 0,12       |
| 40                                      | 0,075      | 0,10           | 0,13       |
| 45                                      | 0,093      | 0,12           | 0,15       |
| 50                                      | 0,11       | 0,14           | 0,18       |
| 55                                      | 0,14       | 0,17           | 0,21       |
| 60                                      | 0,17       | 0,21           | 0,25       |
| 65                                      | 0,23       | 0,27           | 0,31       |
| 70                                      | 0,30       | 0,34           | 0,39       |
| 75                                      | 0,39       | 0,44           | 0,48       |
| 80                                      | 0,52       | 0,57           | 0,62       |
| 85                                      | 0,70       | 0,75           | 0,79       |
| 90                                      | 1          | 1              | 1          |

| <b>MEF 10 min stretched +CQ +MG132 (n=455)</b> |            |                |            |
|------------------------------------------------|------------|----------------|------------|
| Class                                          | Lower CI95 | Cum. Frequency | Upper CI95 |
| 5                                              | 0,0074     | 0,022          | 0,044      |
| 10                                             | 0,015      | 0,033          | 0,056      |
| 15                                             | 0,026      | 0,048          | 0,078      |
| 20                                             | 0,041      | 0,067          | 0,10       |
| 25                                             | 0,063      | 0,10           | 0,13       |
| 30                                             | 0,089      | 0,13           | 0,17       |
| 35                                             | 0,11       | 0,16           | 0,20       |
| 40                                             | 0,14       | 0,18           | 0,23       |
| 45                                             | 0,17       | 0,21           | 0,27       |
| 50                                             | 0,20       | 0,24           | 0,30       |
| 55                                             | 0,26       | 0,31           | 0,37       |
| 60                                             | 0,36       | 0,41           | 0,47       |
| 65                                             | 0,48       | 0,54           | 0,59       |
| 70                                             | 0,54       | 0,60           | 0,66       |
| 75                                             | 0,64       | 0,70           | 0,75       |
| 80                                             | 0,76       | 0,80           | 0,85       |
| 85                                             | 0,86       | 0,90           | 0,93       |
| 90                                             | 1          | 1              | 1          |

| <b>MEF 30 min stretched +CQ +MG132 (n=428)</b> |            |                |            |
|------------------------------------------------|------------|----------------|------------|
| Class                                          | Lower CI95 | Cum. Frequency | Upper CI95 |
| 5                                              | 0,0046     | 0,014          | 0,025      |
| 10                                             | 0,014      | 0,027          | 0,043      |
| 15                                             | 0,018      | 0,034          | 0,053      |
| 20                                             | 0,023      | 0,039          | 0,059      |
| 25                                             | 0,041      | 0,062          | 0,087      |
| 30                                             | 0,057      | 0,080          | 0,11       |
| 35                                             | 0,071      | 0,10           | 0,13       |
| 40                                             | 0,087      | 0,11           | 0,14       |
| 45                                             | 0,10       | 0,13           | 0,16       |
| 50                                             | 0,14       | 0,17           | 0,21       |
| 55                                             | 0,17       | 0,21           | 0,25       |
| 60                                             | 0,22       | 0,26           | 0,30       |
| 65                                             | 0,29       | 0,33           | 0,38       |
| 70                                             | 0,39       | 0,44           | 0,49       |
| 75                                             | 0,52       | 0,56           | 0,61       |
| 80                                             | 0,66       | 0,70           | 0,74       |
| 85                                             | 0,82       | 0,85           | 0,88       |
| 90                                             | 1          | 1              | 1          |

| <b>MEF 1 h stretched +CQ +MG132 (n=429)</b> |            |                |            |
|---------------------------------------------|------------|----------------|------------|
| Class                                       | Lower CI95 | Cum. Frequency | Upper CI95 |
| 5                                           | 0,0023     | 0,0093         | 0,021      |
| 10                                          | 0,0023     | 0,012          | 0,023      |
| 15                                          | 0,0093     | 0,021          | 0,037      |
| 20                                          | 0,016      | 0,030          | 0,049      |
| 25                                          | 0,023      | 0,040          | 0,061      |
| 30                                          | 0,028      | 0,047          | 0,070      |
| 35                                          | 0,044      | 0,065          | 0,091      |
| 40                                          | 0,063      | 0,086          | 0,12       |
| 45                                          | 0,084      | 0,11           | 0,14       |
| 50                                          | 0,093      | 0,12           | 0,15       |
| 55                                          | 0,12       | 0,15           | 0,19       |
| 60                                          | 0,15       | 0,19           | 0,22       |
| 65                                          | 0,21       | 0,24           | 0,29       |
| 70                                          | 0,31       | 0,36           | 0,40       |
| 75                                          | 0,44       | 0,48           | 0,53       |
| 80                                          | 0,58       | 0,63           | 0,67       |
| 85                                          | 0,76       | 0,80           | 0,84       |
| 90                                          | 1          | 1              | 1          |

The lower and upper 95% confidence intervals were analyzed using the method for bias-corrected and accelerated bootstrap intervals. The number of bootstrap intervals was set to 5000 for all histograms based on the indicated high number of cells (n). Cum. Frequency results from mean of upper and lower CI95.

**Table S3. Estimation of the 95% confidence intervals (CI95) for cumulative histograms in Fig. 5**

| <b>MEF unstretched untreated (n=144)</b> |            |                |            | <b>MEF unstretched +LPA (n=203)</b> |            |                |            |
|------------------------------------------|------------|----------------|------------|-------------------------------------|------------|----------------|------------|
| Class                                    | Lower CI95 | Cum. Frequency | Upper CI95 | Class                               | Lower CI95 | Cum. Frequency | Upper CI95 |
| 5                                        | 0,021      | 0,056          | 0,10       | 5                                   | 0,015      | 0,039          | 0,069      |
| 10                                       | 0,069      | 0,12           | 0,17       | 10                                  | 0,079      | 0,12           | 0,16       |
| 15                                       | 0,11       | 0,17           | 0,23       | 15                                  | 0,10       | 0,15           | 0,20       |
| 20                                       | 0,16       | 0,22           | 0,29       | 20                                  | 0,14       | 0,19           | 0,25       |
| 25                                       | 0,17       | 0,24           | 0,31       | 25                                  | 0,19       | 0,25           | 0,31       |
| 30                                       | 0,22       | 0,29           | 0,37       | 30                                  | 0,24       | 0,31           | 0,37       |
| 35                                       | 0,31       | 0,39           | 0,47       | 35                                  | 0,31       | 0,37           | 0,44       |
| 40                                       | 0,38       | 0,46           | 0,55       | 40                                  | 0,37       | 0,44           | 0,51       |
| 45                                       | 0,42       | 0,50           | 0,58       | 45                                  | 0,42       | 0,49           | 0,57       |
| 50                                       | 0,44       | 0,53           | 0,61       | 50                                  | 0,52       | 0,59           | 0,66       |
| 55                                       | 0,51       | 0,59           | 0,67       | 55                                  | 0,59       | 0,65           | 0,71       |
| 60                                       | 0,61       | 0,69           | 0,76       | 60                                  | 0,67       | 0,73           | 0,79       |
| 65                                       | 0,68       | 0,76           | 0,82       | 65                                  | 0,75       | 0,80           | 0,86       |
| 70                                       | 0,72       | 0,80           | 0,85       | 70                                  | 0,79       | 0,84           | 0,89       |
| 75                                       | 0,79       | 0,85           | 0,90       | 75                                  | 0,85       | 0,90           | 0,94       |
| 80                                       | 0,84       | 0,90           | 0,94       | 80                                  | 0,89       | 0,93           | 0,96       |
| 85                                       | 0,91       | 0,95           | 0,98       | 85                                  | 0,93       | 0,96           | 0,98       |
| 90                                       | 1          | 1              | 1          | 90                                  | 1          | 1              | 1          |

  

| <b>MEF 10 min stretched untreated (n=201)</b> |            |                |            | <b>MEF 10 min stretched +LPA (n=191)</b> |            |                |            |
|-----------------------------------------------|------------|----------------|------------|------------------------------------------|------------|----------------|------------|
| Class                                         | Lower CI95 | Cum. Frequency | Upper CI95 | Class                                    | Lower CI95 | Cum. Frequency | Upper CI95 |
| 5                                             | 0,005      | 0,025          | 0,050      | 5                                        | 0          | 0,016          | 0,037      |
| 10                                            | 0,040      | 0,070          | 0,11       | 10                                       | 0,016      | 0,037          | 0,068      |
| 15                                            | 0,070      | 0,11           | 0,16       | 15                                       | 0,031      | 0,063          | 0,10       |
| 20                                            | 0,10       | 0,15           | 0,20       | 20                                       | 0,047      | 0,084          | 0,13       |
| 25                                            | 0,14       | 0,20           | 0,25       | 25                                       | 0,063      | 0,10           | 0,15       |
| 30                                            | 0,16       | 0,22           | 0,28       | 30                                       | 0,084      | 0,13           | 0,18       |
| 35                                            | 0,18       | 0,25           | 0,31       | 35                                       | 0,094      | 0,14           | 0,19       |
| 40                                            | 0,21       | 0,28           | 0,33       | 40                                       | 0,10       | 0,16           | 0,21       |
| 45                                            | 0,26       | 0,33           | 0,39       | 45                                       | 0,14       | 0,19           | 0,25       |
| 50                                            | 0,32       | 0,39           | 0,45       | 50                                       | 0,17       | 0,23           | 0,29       |
| 55                                            | 0,35       | 0,43           | 0,49       | 55                                       | 0,20       | 0,27           | 0,33       |
| 60                                            | 0,40       | 0,48           | 0,54       | 60                                       | 0,26       | 0,34           | 0,40       |
| 65                                            | 0,47       | 0,55           | 0,61       | 65                                       | 0,36       | 0,43           | 0,50       |
| 70                                            | 0,59       | 0,66           | 0,72       | 70                                       | 0,58       | 0,65           | 0,72       |
| 75                                            | 0,72       | 0,78           | 0,83       | 75                                       | 0,68       | 0,74           | 0,80       |
| 80                                            | 0,82       | 0,87           | 0,91       | 80                                       | 0,80       | 0,85           | 0,90       |
| 85                                            | 0,88       | 0,93           | 0,96       | 85                                       | 0,85       | 0,90           | 0,94       |
| 90                                            | 1          | 1              | 1          | 90                                       | 1          | 1              | 1          |

| <b>MEF 30 min stretched untreated (n=198)</b> |            |                |            | <b>MEF 30 min stretched +LPA (n=197)</b> |            |                |            |
|-----------------------------------------------|------------|----------------|------------|------------------------------------------|------------|----------------|------------|
| Class                                         | Lower CI95 | Cum. Frequency | Upper CI95 | Class                                    | Lower CI95 | Cum. Frequency | Upper CI95 |
| 5                                             | 0,005      | 0,020          | 0,045      | 5                                        | 0          | 0              | 0          |
| 10                                            | 0,020      | 0,045          | 0,076      | 10                                       | 0          | 0              | 0          |
| 15                                            | 0,020      | 0,045          | 0,076      | 15                                       | 0          | 0              | 0          |
| 20                                            | 0,045      | 0,081          | 0,12       | 20                                       | 0          | 0,010          | 0,025      |
| 25                                            | 0,051      | 0,091          | 0,13       | 25                                       | 0          | 0,015          | 0,036      |
| 30                                            | 0,076      | 0,12           | 0,17       | 30                                       | 0,0051     | 0,020          | 0,046      |
| 35                                            | 0,10       | 0,15           | 0,20       | 35                                       | 0,010      | 0,030          | 0,056      |
| 40                                            | 0,11       | 0,15           | 0,20       | 40                                       | 0,030      | 0,056          | 0,091      |
| 45                                            | 0,13       | 0,18           | 0,23       | 45                                       | 0,046      | 0,081          | 0,12       |
| 50                                            | 0,15       | 0,20           | 0,26       | 50                                       | 0,071      | 0,12           | 0,16       |
| 55                                            | 0,21       | 0,26           | 0,32       | 55                                       | 0,10       | 0,15           | 0,20       |
| 60                                            | 0,31       | 0,37           | 0,44       | 60                                       | 0,16       | 0,21           | 0,27       |
| 65                                            | 0,39       | 0,46           | 0,53       | 65                                       | 0,24       | 0,31           | 0,37       |
| 70                                            | 0,52       | 0,59           | 0,66       | 70                                       | 0,36       | 0,43           | 0,50       |
| 75                                            | 0,65       | 0,72           | 0,77       | 75                                       | 0,54       | 0,61           | 0,68       |
| 80                                            | 0,73       | 0,79           | 0,85       | 80                                       | 0,72       | 0,78           | 0,83       |
| 85                                            | 0,82       | 0,87           | 0,91       | 85                                       | 0,80       | 0,85           | 0,90       |
| 90                                            | 1          | 1              | 1          | 90                                       | 1          | 1              | 1          |

| <b>MEF 1 h stretched untreated (n=206)</b> |            |                |            | <b>MEF 1 h stretched +LPA (n=212)</b> |            |                |            |
|--------------------------------------------|------------|----------------|------------|---------------------------------------|------------|----------------|------------|
| Class                                      | Lower CI95 | Cum. Frequency | Upper CI95 | Class                                 | Lower CI95 | Cum. Frequency | Upper CI95 |
| 5                                          | 0,0049     | 0,024          | 0,049      | 5                                     | 0          | 0,0047         | 0,019      |
| 10                                         | 0,015      | 0,034          | 0,063      | 10                                    | 0          | 0,0047         | 0,019      |
| 15                                         | 0,015      | 0,039          | 0,068      | 15                                    | 0          | 0,0094         | 0,024      |
| 20                                         | 0,039      | 0,068          | 0,11       | 20                                    | 0          | 0,0094         | 0,024      |
| 25                                         | 0,053      | 0,087          | 0,13       | 25                                    | 0,0047     | 0,019          | 0,042      |
| 30                                         | 0,078      | 0,12           | 0,17       | 30                                    | 0,0047     | 0,024          | 0,047      |
| 35                                         | 0,10       | 0,15           | 0,20       | 35                                    | 0,0047     | 0,028          | 0,052      |
| 40                                         | 0,16       | 0,21           | 0,27       | 40                                    | 0,019      | 0,042          | 0,071      |
| 45                                         | 0,17       | 0,22           | 0,28       | 45                                    | 0,024      | 0,052          | 0,080      |
| 50                                         | 0,20       | 0,26           | 0,32       | 50                                    | 0,038      | 0,071          | 0,11       |
| 55                                         | 0,26       | 0,32           | 0,38       | 55                                    | 0,047      | 0,085          | 0,12       |
| 60                                         | 0,32       | 0,38           | 0,45       | 60                                    | 0,094      | 0,14           | 0,18       |
| 65                                         | 0,42       | 0,49           | 0,56       | 65                                    | 0,12       | 0,17           | 0,23       |
| 70                                         | 0,54       | 0,61           | 0,67       | 70                                    | 0,23       | 0,29           | 0,35       |
| 75                                         | 0,66       | 0,72           | 0,78       | 75                                    | 0,35       | 0,42           | 0,49       |
| 80                                         | 0,76       | 0,82           | 0,87       | 80                                    | 0,50       | 0,57           | 0,63       |
| 85                                         | 0,88       | 0,92           | 0,96       | 85                                    | 0,70       | 0,76           | 0,82       |
| 90                                         | 1          | 1              | 1          | 90                                    | 1          | 1              | 1          |

| <b>MEF 1 h stretched +serum (n=200)</b> |            |                |            |
|-----------------------------------------|------------|----------------|------------|
| Class                                   | Lower CI95 | Cum. Frequency | Upper CI95 |
| 5                                       | 0          | 0,0050         | 0,020      |
| 10                                      | 0          | 0,010          | 0,030      |
| 15                                      | 0,015      | 0,035          | 0,065      |
| 20                                      | 0,030      | 0,055          | 0,10       |
| 25                                      | 0,035      | 0,060          | 0,10       |
| 30                                      | 0,035      | 0,065          | 0,10       |
| 35                                      | 0,040      | 0,075          | 0,12       |
| 40                                      | 0,065      | 0,10           | 0,15       |
| 45                                      | 0,080      | 0,12           | 0,17       |
| 50                                      | 0,085      | 0,13           | 0,18       |
| 55                                      | 0,13       | 0,18           | 0,24       |
| 60                                      | 0,17       | 0,22           | 0,28       |
| 65                                      | 0,23       | 0,29           | 0,35       |
| 70                                      | 0,30       | 0,37           | 0,44       |
| 75                                      | 0,41       | 0,48           | 0,55       |
| 80                                      | 0,58       | 0,65           | 0,71       |
| 85                                      | 0,77       | 0,83           | 0,88       |
| 90                                      | 1          | 1              | 1          |

The lower and upper 95% confidence intervals were analyzed using the method for bias-corrected and accelerated bootstrap intervals. The number of bootstrap intervals was set to 5000 for all histograms based on the indicated high number of cells (n). Cum. Frequency results from mean of upper and lower CI95.

**Table S4. Estimation of the 95% confidence intervals (CI95) for cumulative histograms in Fig. 6**

| <b>MEF unstretched +LPA (n=303)</b> |            |                |            | <b>MEF unstretched +LPA +CQ (n=292)</b> |            |                |            |
|-------------------------------------|------------|----------------|------------|-----------------------------------------|------------|----------------|------------|
| Class                               | Lower CI95 | Cum. Frequency | Upper CI95 | Class                                   | Lower CI95 | Cum. Frequency | Upper CI95 |
| 5                                   | 0,056      | 0,086          | 0,12       | 5                                       | 0,021      | 0,041          | 0,065      |
| 10                                  | 0,13       | 0,17           | 0,21       | 10                                      | 0,055      | 0,082          | 0,12       |
| 15                                  | 0,19       | 0,23           | 0,28       | 15                                      | 0,10       | 0,14           | 0,18       |
| 20                                  | 0,24       | 0,28           | 0,34       | 20                                      | 0,17       | 0,22           | 0,27       |
| 25                                  | 0,29       | 0,35           | 0,40       | 25                                      | 0,23       | 0,28           | 0,33       |
| 30                                  | 0,35       | 0,41           | 0,46       | 30                                      | 0,28       | 0,34           | 0,39       |
| 35                                  | 0,41       | 0,47           | 0,52       | 35                                      | 0,35       | 0,40           | 0,46       |
| 40                                  | 0,48       | 0,53           | 0,59       | 40                                      | 0,40       | 0,46           | 0,51       |
| 45                                  | 0,50       | 0,56           | 0,61       | 45                                      | 0,47       | 0,53           | 0,59       |
| 50                                  | 0,55       | 0,61           | 0,66       | 50                                      | 0,54       | 0,60           | 0,66       |
| 55                                  | 0,61       | 0,66           | 0,71       | 55                                      | 0,62       | 0,67           | 0,73       |
| 60                                  | 0,64       | 0,70           | 0,75       | 60                                      | 0,66       | 0,72           | 0,77       |
| 65                                  | 0,74       | 0,78           | 0,83       | 65                                      | 0,71       | 0,76           | 0,80       |
| 70                                  | 0,80       | 0,84           | 0,88       | 70                                      | 0,76       | 0,80           | 0,85       |
| 75                                  | 0,86       | 0,89           | 0,93       | 75                                      | 0,79       | 0,84           | 0,88       |
| 80                                  | 0,90       | 0,93           | 0,96       | 80                                      | 0,87       | 0,90           | 0,94       |
| 85                                  | 0,96       | 0,98           | 1          | 85                                      | 0,91       | 0,94           | 0,97       |
| 90                                  | 1          | 1              | 1          | 90                                      | 1          | 1              | 1          |

  

| <b>MEF 10 min stretched +LPA (n=301)</b> |            |                |            | <b>MEF 10 min stretched +LPA +CQ (n=315)</b> |            |                |            |
|------------------------------------------|------------|----------------|------------|----------------------------------------------|------------|----------------|------------|
| Class                                    | Lower CI95 | Cum. Frequency | Upper CI95 | Class                                        | Lower CI95 | Cum. Frequency | Upper CI95 |
| 5                                        | 0,013      | 0,030          | 0,050      | 5                                            | 0,035      | 0,060          | 0,089      |
| 10                                       | 0,023      | 0,047          | 0,073      | 10                                           | 0,054      | 0,083          | 0,11       |
| 15                                       | 0,030      | 0,056          | 0,083      | 15                                           | 0,076      | 0,11           | 0,15       |
| 20                                       | 0,050      | 0,076          | 0,11       | 20                                           | 0,089      | 0,12           | 0,17       |
| 25                                       | 0,073      | 0,10           | 0,14       | 25                                           | 0,12       | 0,16           | 0,20       |
| 30                                       | 0,10       | 0,13           | 0,17       | 30                                           | 0,17       | 0,22           | 0,26       |
| 35                                       | 0,12       | 0,16           | 0,21       | 35                                           | 0,21       | 0,25           | 0,30       |
| 40                                       | 0,15       | 0,20           | 0,24       | 40                                           | 0,24       | 0,29           | 0,34       |
| 45                                       | 0,21       | 0,26           | 0,31       | 45                                           | 0,32       | 0,37           | 0,43       |
| 50                                       | 0,26       | 0,31           | 0,37       | 50                                           | 0,38       | 0,44           | 0,49       |
| 55                                       | 0,34       | 0,39           | 0,45       | 55                                           | 0,43       | 0,49           | 0,54       |
| 60                                       | 0,41       | 0,47           | 0,52       | 60                                           | 0,50       | 0,55           | 0,60       |
| 65                                       | 0,49       | 0,54           | 0,59       | 65                                           | 0,60       | 0,65           | 0,70       |
| 70                                       | 0,59       | 0,65           | 0,70       | 70                                           | 0,70       | 0,75           | 0,79       |
| 75                                       | 0,72       | 0,77           | 0,82       | 75                                           | 0,78       | 0,82           | 0,86       |
| 80                                       | 0,81       | 0,85           | 0,89       | 80                                           | 0,84       | 0,88           | 0,91       |
| 85                                       | 0,89       | 0,92           | 0,95       | 85                                           | 0,92       | 0,95           | 0,97       |
| 90                                       | 1          | 1              | 1          | 90                                           | 1          | 1              | 1          |

| <b>MEF 30 min stretched +LPA (n=286)</b> |            |                |            |
|------------------------------------------|------------|----------------|------------|
| Class                                    | Lower CI95 | Cum. Frequency | Upper CI95 |
| 5                                        | 0          | 0              | 0          |
| 10                                       | 0          | 0,010          | 0,024      |
| 15                                       | 0,0070     | 0,021          | 0,038      |
| 20                                       | 0,010      | 0,024          | 0,045      |
| 25                                       | 0,021      | 0,042          | 0,066      |
| 30                                       | 0,035      | 0,059          | 0,087      |
| 35                                       | 0,038      | 0,066          | 0,094      |
| 40                                       | 0,045      | 0,073          | 0,10       |
| 45                                       | 0,056      | 0,087          | 0,12       |
| 50                                       | 0,066      | 0,10           | 0,14       |
| 55                                       | 0,11       | 0,15           | 0,19       |
| 60                                       | 0,17       | 0,22           | 0,27       |
| 65                                       | 0,24       | 0,29           | 0,34       |
| 70                                       | 0,37       | 0,43           | 0,49       |
| 75                                       | 0,50       | 0,55           | 0,61       |
| 80                                       | 0,65       | 0,70           | 0,76       |
| 85                                       | 0,80       | 0,84           | 0,88       |
| 90                                       | 1          | 1              | 1          |

| <b>MEF 30 min stretched +LPA +CQ (n=313)</b> |            |                |            |
|----------------------------------------------|------------|----------------|------------|
| Class                                        | Lower CI95 | Cum. Frequency | Upper CI95 |
| 5                                            | 0,013      | 0,029          | 0,051      |
| 10                                           | 0,042      | 0,067          | 0,10       |
| 15                                           | 0,077      | 0,11           | 0,14       |
| 20                                           | 0,089      | 0,12           | 0,16       |
| 25                                           | 0,12       | 0,16           | 0,20       |
| 30                                           | 0,14       | 0,19           | 0,23       |
| 35                                           | 0,15       | 0,19           | 0,24       |
| 40                                           | 0,17       | 0,21           | 0,26       |
| 45                                           | 0,19       | 0,24           | 0,29       |
| 50                                           | 0,25       | 0,30           | 0,35       |
| 55                                           | 0,29       | 0,34           | 0,39       |
| 60                                           | 0,36       | 0,41           | 0,47       |
| 65                                           | 0,44       | 0,50           | 0,56       |
| 70                                           | 0,58       | 0,64           | 0,69       |
| 75                                           | 0,68       | 0,73           | 0,78       |
| 80                                           | 0,77       | 0,82           | 0,86       |
| 85                                           | 0,86       | 0,90           | 0,93       |
| 90                                           | 1          | 1              | 1          |

| <b>MEF 1 h stretched +LPA (n=290)</b> |            |                |            |
|---------------------------------------|------------|----------------|------------|
| Class                                 | Lower CI95 | Cum. Frequency | Upper CI95 |
| 5                                     | 0          | 0,010          | 0,024      |
| 10                                    | 0,0034     | 0,014          | 0,028      |
| 15                                    | 0,017      | 0,034          | 0,059      |
| 20                                    | 0,017      | 0,034          | 0,059      |
| 25                                    | 0,021      | 0,041          | 0,066      |
| 30                                    | 0,028      | 0,052          | 0,079      |
| 35                                    | 0,041      | 0,066          | 0,10       |
| 40                                    | 0,055      | 0,086          | 0,12       |
| 45                                    | 0,069      | 0,10           | 0,13       |
| 50                                    | 0,079      | 0,11           | 0,15       |
| 55                                    | 0,10       | 0,14           | 0,18       |
| 60                                    | 0,14       | 0,19           | 0,23       |
| 65                                    | 0,20       | 0,24           | 0,30       |
| 70                                    | 0,36       | 0,41           | 0,47       |
| 75                                    | 0,49       | 0,54           | 0,60       |
| 80                                    | 0,62       | 0,68           | 0,73       |
| 85                                    | 0,80       | 0,85           | 0,89       |
| 90                                    | 1          | 1              | 1          |

| <b>MEF 1 h stretched +LPA +CQ (n=321)</b> |            |                |            |
|-------------------------------------------|------------|----------------|------------|
| Class                                     | Lower CI95 | Cum. Frequency | Upper CI95 |
| 5                                         | 0,006      | 0,019          | 0,037      |
| 10                                        | 0,025      | 0,044          | 0,069      |
| 15                                        | 0,053      | 0,081          | 0,11       |
| 20                                        | 0,081      | 0,12           | 0,15       |
| 25                                        | 0,11       | 0,15           | 0,19       |
| 30                                        | 0,14       | 0,18           | 0,22       |
| 35                                        | 0,16       | 0,20           | 0,24       |
| 40                                        | 0,18       | 0,23           | 0,27       |
| 45                                        | 0,21       | 0,26           | 0,30       |
| 50                                        | 0,24       | 0,29           | 0,34       |
| 55                                        | 0,30       | 0,35           | 0,40       |
| 60                                        | 0,36       | 0,41           | 0,47       |
| 65                                        | 0,42       | 0,47           | 0,52       |
| 70                                        | 0,51       | 0,57           | 0,62       |
| 75                                        | 0,62       | 0,68           | 0,73       |
| 80                                        | 0,74       | 0,79           | 0,83       |
| 85                                        | 0,85       | 0,89           | 0,92       |
| 90                                        | 1          | 1              | 1          |

The lower and upper 95% confidence intervals were analyzed using the method for bias-corrected and accelerated bootstrap intervals. The number of bootstrap intervals was set to 5000 for all histograms based on the indicated high number of cells (n). Cum. Frequency results from mean of upper and lower CI95.



**Table S5. Estimation of the 95% confidence intervals (CI95) for cumulative histograms in Fig. 7**

| <b>A7r5 BAG3-WT unstretched (n=298)</b> |            |                |            | <b>A7r5 BAG3-WAWA unstretched (n=242)</b> |            |                |            |
|-----------------------------------------|------------|----------------|------------|-------------------------------------------|------------|----------------|------------|
| Class                                   | Lower CI95 | Cum. Frequency | Upper CI95 | Class                                     | Lower CI95 | Cum. Frequency | Upper CI95 |
| 5                                       | 0,037      | 0,064          | 0,091      | 5                                         | 0,045      | 0,079          | 0,12       |
| 10                                      | 0,074      | 0,10           | 0,14       | 10                                        | 0,09       | 0,13           | 0,17       |
| 15                                      | 0,11       | 0,15           | 0,19       | 15                                        | 0,14       | 0,18           | 0,23       |
| 20                                      | 0,15       | 0,19           | 0,24       | 20                                        | 0,18       | 0,23           | 0,29       |
| 25                                      | 0,17       | 0,21           | 0,27       | 25                                        | 0,23       | 0,28           | 0,34       |
| 30                                      | 0,21       | 0,26           | 0,32       | 30                                        | 0,26       | 0,31           | 0,38       |
| 35                                      | 0,26       | 0,30           | 0,36       | 35                                        | 0,33       | 0,39           | 0,45       |
| 40                                      | 0,30       | 0,35           | 0,41       | 40                                        | 0,34       | 0,40           | 0,47       |
| 45                                      | 0,36       | 0,41           | 0,47       | 45                                        | 0,42       | 0,48           | 0,55       |
| 50                                      | 0,42       | 0,47           | 0,53       | 50                                        | 0,49       | 0,55           | 0,61       |
| 55                                      | 0,48       | 0,53           | 0,59       | 55                                        | 0,56       | 0,62           | 0,68       |
| 60                                      | 0,56       | 0,61           | 0,67       | 60                                        | 0,63       | 0,69           | 0,74       |
| 65                                      | 0,62       | 0,67           | 0,73       | 65                                        | 0,67       | 0,73           | 0,79       |
| 70                                      | 0,68       | 0,73           | 0,78       | 70                                        | 0,74       | 0,79           | 0,84       |
| 75                                      | 0,77       | 0,81           | 0,86       | 75                                        | 0,79       | 0,83           | 0,88       |
| 80                                      | 0,86       | 0,89           | 0,93       | 80                                        | 0,86       | 0,90           | 0,93       |
| 85                                      | 0,93       | 0,95           | 0,98       | 85                                        | 0,93       | 0,95           | 0,98       |
| 90                                      | 1          | 1              | 1          | 90                                        | 1          | 1              | 1          |

  

| <b>A7r5 BAG3-WT 30 min stretched (n=206)</b> |            |                |            | <b>A7r5 BAG3-WAWA 30 min stretched (n=192)</b> |            |                |            |
|----------------------------------------------|------------|----------------|------------|------------------------------------------------|------------|----------------|------------|
| Class                                        | Lower CI95 | Cum. Frequency | Upper CI95 | Class                                          | Lower CI95 | Cum. Frequency | Upper CI95 |
| 5                                            | 0          | 0,010          | 0,029      | 5                                              | 0,0052     | 0,026          | 0,052      |
| 10                                           | 0          | 0,015          | 0,034      | 10                                             | 0,021      | 0,047          | 0,078      |
| 15                                           | 0,0049     | 0,024          | 0,044      | 15                                             | 0,042      | 0,078          | 0,12       |
| 20                                           | 0,0049     | 0,024          | 0,044      | 20                                             | 0,078      | 0,11           | 0,17       |
| 25                                           | 0,015      | 0,034          | 0,063      | 25                                             | 0,13       | 0,17           | 0,23       |
| 30                                           | 0,034      | 0,058          | 0,10       | 30                                             | 0,19       | 0,24           | 0,31       |
| 35                                           | 0,034      | 0,063          | 0,10       | 35                                             | 0,24       | 0,30           | 0,38       |
| 40                                           | 0,073      | 0,11           | 0,16       | 40                                             | 0,28       | 0,34           | 0,41       |
| 45                                           | 0,11       | 0,16           | 0,21       | 45                                             | 0,33       | 0,40           | 0,47       |
| 50                                           | 0,18       | 0,24           | 0,30       | 50                                             | 0,42       | 0,49           | 0,56       |
| 55                                           | 0,30       | 0,36           | 0,43       | 55                                             | 0,54       | 0,61           | 0,68       |
| 60                                           | 0,46       | 0,53           | 0,60       | 60                                             | 0,65       | 0,71           | 0,77       |
| 65                                           | 0,54       | 0,61           | 0,67       | 65                                             | 0,71       | 0,78           | 0,83       |
| 70                                           | 0,63       | 0,69           | 0,75       | 70                                             | 0,79       | 0,84           | 0,89       |
| 75                                           | 0,75       | 0,80           | 0,85       | 75                                             | 0,82       | 0,87           | 0,91       |
| 80                                           | 0,82       | 0,87           | 0,92       | 80                                             | 0,86       | 0,91           | 0,94       |
| 85                                           | 0,91       | 0,95           | 0,98       | 85                                             | 0,91       | 0,94           | 0,97       |
| 90                                           | 1          | 1              | 1          | 90                                             | 1          | 1              | 1          |

| <b>A7r5 BAG3-WT 1 h stretched (n=183)</b> |            |                |            | <b>A7r5 BAG3-WAWA 1 h stretched (n=195)</b> |            |                |            |
|-------------------------------------------|------------|----------------|------------|---------------------------------------------|------------|----------------|------------|
| Class                                     | Lower CI95 | Cum. Frequency | Upper CI95 | Class                                       | Lower CI95 | Cum. Frequency | Upper CI95 |
| 5                                         | 0          | 0              | 0          | 5                                           | 0          | 0,015          | 0,036      |
| 10                                        | 0          | 0              | 0          | 10                                          | 0,0051     | 0,021          | 0,046      |
| 15                                        | 0          | 0,0055         | 0,022      | 15                                          | 0,010      | 0,031          | 0,062      |
| 20                                        | 0          | 0,0055         | 0,022      | 20                                          | 0,010      | 0,031          | 0,062      |
| 25                                        | 0          | 0,0055         | 0,022      | 25                                          | 0,015      | 0,041          | 0,072      |
| 30                                        | 0          | 0,0055         | 0,022      | 30                                          | 0,026      | 0,051          | 0,087      |
| 35                                        | 0          | 0,0055         | 0,022      | 35                                          | 0,036      | 0,067          | 0,11       |
| 40                                        | 0          | 0,011          | 0,027      | 40                                          | 0,046      | 0,082          | 0,12       |
| 45                                        | 0          | 0,016          | 0,038      | 45                                          | 0,10       | 0,14           | 0,19       |
| 50                                        | 0,033      | 0,066          | 0,10       | 50                                          | 0,17       | 0,22           | 0,28       |
| 55                                        | 0,11       | 0,16           | 0,22       | 55                                          | 0,34       | 0,41           | 0,48       |
| 60                                        | 0,19       | 0,25           | 0,31       | 60                                          | 0,52       | 0,59           | 0,66       |
| 65                                        | 0,38       | 0,46           | 0,53       | 65                                          | 0,69       | 0,75           | 0,81       |
| 70                                        | 0,54       | 0,61           | 0,68       | 70                                          | 0,76       | 0,82           | 0,87       |
| 75                                        | 0,66       | 0,73           | 0,79       | 75                                          | 0,84       | 0,89           | 0,93       |
| 80                                        | 0,75       | 0,81           | 0,87       | 80                                          | 0,89       | 0,93           | 0,96       |
| 85                                        | 0,84       | 0,89           | 0,93       | 85                                          | 0,92       | 0,95           | 0,98       |
| 90                                        | 1          | 1              | 1          | 90                                          | 1          | 1              | 1          |

  

| <b>A7r5 BAG3-WT 4 h stretched (n=275)</b> |            |                |            | <b>A7r5 BAG3-WAWA 4 h stretched (n=223)</b> |            |                |            |
|-------------------------------------------|------------|----------------|------------|---------------------------------------------|------------|----------------|------------|
| Class                                     | Lower CI95 | Cum. Frequency | Upper CI95 | Class                                       | Lower CI95 | Cum. Frequency | Upper CI95 |
| 5                                         | 0          | 0              | 0          | 5                                           | 0          | 0,0090         | 0,027      |
| 10                                        | 0          | 0              | 0          | 10                                          | 0          | 0,0090         | 0,027      |
| 15                                        | 0          | 0              | 0          | 15                                          | 0          | 0,013          | 0,031      |
| 20                                        | 0          | 0              | 0          | 20                                          | 0          | 0,013          | 0,031      |
| 25                                        | 0          | 0              | 0          | 25                                          | 0          | 0,013          | 0,031      |
| 30                                        | 0          | 0              | 0          | 30                                          | 0          | 0,013          | 0,031      |
| 35                                        | 0          | 0              | 0          | 35                                          | 0          | 0,013          | 0,031      |
| 40                                        | 0          | 0              | 0          | 40                                          | 0,0090     | 0,027          | 0,054      |
| 45                                        | 0          | 0              | 0          | 45                                          | 0,013      | 0,031          | 0,058      |
| 50                                        | 0          | 0,0036         | 0,015      | 50                                          | 0,022      | 0,049          | 0,081      |
| 55                                        | 0,0073     | 0,022          | 0,040      | 55                                          | 0,040      | 0,072          | 0,11       |
| 60                                        | 0,015      | 0,033          | 0,055      | 60                                          | 0,090      | 0,13           | 0,17       |
| 65                                        | 0,076      | 0,11           | 0,15       | 65                                          | 0,17       | 0,23           | 0,28       |
| 70                                        | 0,21       | 0,27           | 0,32       | 70                                          | 0,29       | 0,35           | 0,41       |
| 75                                        | 0,40       | 0,46           | 0,52       | 75                                          | 0,47       | 0,54           | 0,61       |
| 80                                        | 0,58       | 0,64           | 0,69       | 80                                          | 0,62       | 0,69           | 0,74       |
| 85                                        | 0,76       | 0,81           | 0,85       | 85                                          | 0,78       | 0,83           | 0,87       |
| 90                                        | 1          | 1              | 1          | 90                                          | 1          | 1              | 1          |

The lower and upper 95% confidence intervals were analyzed using the method for bias-corrected and accelerated bootstrap intervals. The number of bootstrap intervals was set to 5000 for all histograms based on the indicated high number of cells (n). Cum. Frequency results from mean of upper and lower CI95.

**Table S6. Estimation of the 95% confidence intervals (CI95) for cumulative histograms in Fig. S1**

| <b>A7r5 unstretched untreated (n=160)</b> |            |                |            | <b>A7r5 unstretched +LPA (n=138)</b> |            |                |            |
|-------------------------------------------|------------|----------------|------------|--------------------------------------|------------|----------------|------------|
| Class                                     | Lower CI95 | Cum. Frequency | Upper CI95 | Class                                | Lower CI95 | Cum. Frequency | Upper CI95 |
| 5                                         | 0,0063     | 0,031          | 0,063      | 5                                    | 0,014      | 0,043          | 0,080      |
| 10                                        | 0,025      | 0,056          | 0,10       | 10                                   | 0,058      | 0,10           | 0,16       |
| 15                                        | 0,063      | 0,11           | 0,16       | 15                                   | 0,094      | 0,15           | 0,22       |
| 20                                        | 0,088      | 0,14           | 0,19       | 20                                   | 0,14       | 0,20           | 0,28       |
| 25                                        | 0,16       | 0,21           | 0,28       | 25                                   | 0,17       | 0,24           | 0,32       |
| 30                                        | 0,21       | 0,28           | 0,35       | 30                                   | 0,23       | 0,30           | 0,38       |
| 35                                        | 0,30       | 0,38           | 0,45       | 35                                   | 0,30       | 0,37           | 0,46       |
| 40                                        | 0,35       | 0,43           | 0,50       | 40                                   | 0,34       | 0,41           | 0,50       |
| 45                                        | 0,41       | 0,49           | 0,56       | 45                                   | 0,37       | 0,44           | 0,54       |
| 50                                        | 0,49       | 0,56           | 0,64       | 50                                   | 0,43       | 0,51           | 0,59       |
| 55                                        | 0,52       | 0,59           | 0,67       | 55                                   | 0,49       | 0,57           | 0,65       |
| 60                                        | 0,64       | 0,71           | 0,78       | 60                                   | 0,54       | 0,62           | 0,71       |
| 65                                        | 0,66       | 0,73           | 0,80       | 65                                   | 0,62       | 0,69           | 0,77       |
| 70                                        | 0,69       | 0,76           | 0,82       | 70                                   | 0,69       | 0,76           | 0,83       |
| 75                                        | 0,75       | 0,81           | 0,87       | 75                                   | 0,74       | 0,80           | 0,87       |
| 80                                        | 0,86       | 0,90           | 0,94       | 80                                   | 0,82       | 0,88           | 0,93       |
| 85                                        | 0,90       | 0,94           | 0,98       | 85                                   | 0,89       | 0,93           | 0,97       |
| 90                                        | 1          | 1              | 1          | 90                                   | 1          | 1              | 1          |

  

| <b>A7r5 30 min stretched untreated (n=148)</b> |            |                |            | <b>A7r5 30 min stretched +LPA (n=147)</b> |            |                |            |
|------------------------------------------------|------------|----------------|------------|-------------------------------------------|------------|----------------|------------|
| Class                                          | Lower CI95 | Cum. Frequency | Upper CI95 | Class                                     | Lower CI95 | Cum. Frequency | Upper CI95 |
| 5                                              | 0          | 0              | 0          | 5                                         | 0          | 0,0068         | 0,027      |
| 10                                             | 0          | 0              | 0          | 10                                        | 0          | 0,0068         | 0,027      |
| 15                                             | 0          | 0              | 0          | 15                                        | 0          | 0,0068         | 0,027      |
| 20                                             | 0          | 0              | 0          | 20                                        | 0          | 0,0068         | 0,027      |
| 25                                             | 0          | 0,0068         | 0,027      | 25                                        | 0          | 0,0068         | 0,027      |
| 30                                             | 0,0068     | 0,027          | 0,054      | 30                                        | 0          | 0,0068         | 0,027      |
| 35                                             | 0,020      | 0,054          | 0,095      | 35                                        | 0          | 0,0068         | 0,027      |
| 40                                             | 0,027      | 0,061          | 0,10       | 40                                        | 0          | 0,0068         | 0,027      |
| 45                                             | 0,061      | 0,11           | 0,16       | 45                                        | 0,020      | 0,041          | 0,082      |
| 50                                             | 0,11       | 0,16           | 0,22       | 50                                        | 0,048      | 0,082          | 0,13       |
| 55                                             | 0,14       | 0,20           | 0,27       | 55                                        | 0,13       | 0,18           | 0,25       |
| 60                                             | 0,19       | 0,26           | 0,33       | 60                                        | 0,27       | 0,34           | 0,42       |
| 65                                             | 0,42       | 0,49           | 0,57       | 65                                        | 0,43       | 0,51           | 0,59       |
| 70                                             | 0,55       | 0,62           | 0,70       | 70                                        | 0,61       | 0,69           | 0,76       |
| 75                                             | 0,65       | 0,72           | 0,79       | 75                                        | 0,73       | 0,80           | 0,86       |
| 80                                             | 0,74       | 0,80           | 0,87       | 80                                        | 0,82       | 0,88           | 0,93       |
| 85                                             | 0,88       | 0,93           | 0,97       | 85                                        | 0,86       | 0,90           | 0,95       |
| 90                                             | 1          | 1              | 1          | 90                                        | 1          | 1              | 1          |

| <b>A7r5 1 h stretched untreated (n=142)</b> |            |                |            | <b>A7r5 1 h stretched +LPA (n=158)</b> |            |                |            |
|---------------------------------------------|------------|----------------|------------|----------------------------------------|------------|----------------|------------|
| Class                                       | Lower CI95 | Cum. Frequency | Upper CI95 | Class                                  | Lower CI95 | Cum. Frequency | Upper CI95 |
| 5                                           | 0          | 0              | 0          | 5                                      | 0          | 0              | 0          |
| 10                                          | 0          | 0              | 0          | 10                                     | 0          | 0              | 0          |
| 15                                          | 0          | 0              | 0          | 15                                     | 0          | 0              | 0          |
| 20                                          | 0          | 0              | 0          | 20                                     | 0          | 0              | 0          |
| 25                                          | 0          | 0              | 0          | 25                                     | 0          | 0              | 0          |
| 30                                          | 0          | 0              | 0          | 30                                     | 0          | 0              | 0          |
| 35                                          | 0          | 0              | 0          | 35                                     | 0          | 0              | 0          |
| 40                                          | 0          | 0              | 0          | 40                                     | 0          | 0              | 0          |
| 45                                          | 0          | 0,021          | 0,049      | 45                                     | 0          | 0              | 0          |
| 50                                          | 0,0070     | 0,035          | 0,070      | 50                                     | 0,0063     | 0,025          | 0,057      |
| 55                                          | 0,035      | 0,070          | 0,12       | 55                                     | 0,0063     | 0,025          | 0,057      |
| 60                                          | 0,056      | 0,10           | 0,15       | 60                                     | 0,013      | 0,038          | 0,070      |
| 65                                          | 0,15       | 0,21           | 0,28       | 65                                     | 0,089      | 0,14           | 0,20       |
| 70                                          | 0,34       | 0,42           | 0,49       | 70                                     | 0,25       | 0,32           | 0,40       |
| 75                                          | 0,51       | 0,58           | 0,66       | 75                                     | 0,42       | 0,50           | 0,58       |
| 80                                          | 0,69       | 0,76           | 0,82       | 80                                     | 0,59       | 0,66           | 0,73       |
| 85                                          | 0,80       | 0,86           | 0,91       | 85                                     | 0,73       | 0,79           | 0,85       |
| 90                                          | 1          | 1              | 1          | 90                                     | 1          | 1              | 1          |

  

| <b>A7r5 1 h stretched +serum (n=173)</b> |            |                |            | <b>A7r5 4 h stretched untreated (n=155)</b> |            |                |            |
|------------------------------------------|------------|----------------|------------|---------------------------------------------|------------|----------------|------------|
| Class                                    | Lower CI95 | Cum. Frequency | Upper CI95 | Class                                       | Lower CI95 | Cum. Frequency | Upper CI95 |
| 5                                        | 0          | 0              | 0          | 5                                           | 0          | 0              | 0          |
| 10                                       | 0          | 0              | 0          | 10                                          | 0          | 0              | 0          |
| 15                                       | 0          | 0              | 0          | 15                                          | 0          | 0              | 0          |
| 20                                       | 0          | 0              | 0          | 20                                          | 0          | 0              | 0          |
| 25                                       | 0          | 0              | 0          | 25                                          | 0          | 0              | 0          |
| 30                                       | 0          | 0              | 0          | 30                                          | 0          | 0              | 0          |
| 35                                       | 0          | 0              | 0          | 35                                          | 0          | 0              | 0          |
| 40                                       | 0          | 0              | 0          | 40                                          | 0          | 0              | 0          |
| 45                                       | 0          | 0              | 0          | 45                                          | 0          | 0              | 0          |
| 50                                       | 0          | 0,0058         | 0,023      | 50                                          | 0          | 0,0065         | 0,026      |
| 55                                       | 0          | 0,0058         | 0,023      | 55                                          | 0          | 0,0065         | 0,026      |
| 60                                       | 0,0058     | 0,023          | 0,052      | 60                                          | 0          | 0,0065         | 0,026      |
| 65                                       | 0,023      | 0,052          | 0,092      | 65                                          | 0          | 0,013          | 0,032      |
| 70                                       | 0,12       | 0,17           | 0,23       | 70                                          | 0,045      | 0,084          | 0,14       |
| 75                                       | 0,41       | 0,48           | 0,55       | 75                                          | 0,15       | 0,21           | 0,28       |
| 80                                       | 0,64       | 0,71           | 0,78       | 80                                          | 0,44       | 0,52           | 0,59       |
| 85                                       | 0,79       | 0,84           | 0,90       | 85                                          | 0,70       | 0,77           | 0,84       |
| 90                                       | 1          | 1              | 1          | 90                                          | 1          | 1              | 1          |

| <b>A7r5 4 h stretched +LPA (n=160)</b> |            |                |            |
|----------------------------------------|------------|----------------|------------|
| Class                                  | Lower CI95 | Cum. Frequency | Upper CI95 |
| 5                                      | 0          | 0              | 0          |
| 10                                     | 0          | 0              | 0          |
| 15                                     | 0          | 0              | 0          |
| 20                                     | 0          | 0              | 0          |
| 25                                     | 0          | 0              | 0          |
| 30                                     | 0          | 0              | 0          |
| 35                                     | 0          | 0              | 0          |
| 40                                     | 0          | 0              | 0          |
| 45                                     | 0          | 0              | 0          |
| 50                                     | 0          | 0              | 0          |
| 55                                     | 0          | 0              | 0          |
| 60                                     | 0          | 0              | 0          |
| 65                                     | 0          | 0              | 0          |
| 70                                     | 0,031      | 0,069          | 0,11       |
| 75                                     | 0,21       | 0,28           | 0,35       |
| 80                                     | 0,46       | 0,54           | 0,62       |
| 85                                     | 0,72       | 0,78           | 0,85       |
| 90                                     | 1          | 1              | 1          |

The lower and upper 95% confidence intervals were analyzed using the method for bias-corrected and accelerated bootstrap intervals. The number of bootstrap intervals was set to 5000 for all histograms based on the indicated high number of cells (n). Cum. Frequency results from mean of upper and lower CI95.

**Table S7. Estimation of the 95% confidence intervals (CI95) for cumulative histograms in Fig. S2**

| <b>A7r5 unstretched (n=459)</b> |            |                |            | <b>A7r5 4 h stretched (n=292)</b> |            |                |            |
|---------------------------------|------------|----------------|------------|-----------------------------------|------------|----------------|------------|
| Class                           | Lower CI95 | Cum. Frequency | Upper CI95 | Class                             | Lower CI95 | Cum. Frequency | Upper CI95 |
| 5                               | 0,052      | 0,074          | 0,10       | 5                                 | 0          | 0              | 0          |
| 10                              | 0,11       | 0,14           | 0,17       | 10                                | 0          | 0              | 0          |
| 15                              | 0,15       | 0,19           | 0,22       | 15                                | 0          | 0              | 0          |
| 20                              | 0,19       | 0,22           | 0,26       | 20                                | 0          | 0              | 0          |
| 25                              | 0,24       | 0,27           | 0,32       | 25                                | 0          | 0              | 0          |
| 30                              | 0,31       | 0,35           | 0,39       | 30                                | 0          | 0              | 0          |
| 35                              | 0,36       | 0,41           | 0,46       | 35                                | 0          | 0              | 0          |
| 40                              | 0,42       | 0,47           | 0,51       | 40                                | 0          | 0              | 0          |
| 45                              | 0,47       | 0,51           | 0,56       | 45                                | 0          | 0              | 0          |
| 50                              | 0,54       | 0,59           | 0,63       | 50                                | 0          | 0              | 0          |
| 55                              | 0,59       | 0,63           | 0,68       | 55                                | 0          | 0              | 0          |
| 60                              | 0,64       | 0,68           | 0,73       | 60                                | 0          | 0              | 0          |
| 65                              | 0,69       | 0,73           | 0,77       | 65                                | 0          | 0,010          | 0,024      |
| 70                              | 0,73       | 0,77           | 0,81       | 70                                | 0,038      | 0,065          | 0,10       |
| 75                              | 0,78       | 0,82           | 0,85       | 75                                | 0,16       | 0,21           | 0,25       |
| 80                              | 0,85       | 0,88           | 0,91       | 80                                | 0,37       | 0,42           | 0,48       |
| 85                              | 0,89       | 0,92           | 0,94       | 85                                | 0,65       | 0,71           | 0,76       |
| 90                              | 1          | 1              | 1          | 90                                | 1,00       | 1,00           | 1,00       |

  

| <b>A7r5 4 h stretched + 4 h unstretched (n=268)</b> |            |                |            | <b>A7r5 4 h stretched + 10 min stretched (n=180)</b> |            |                |            |
|-----------------------------------------------------|------------|----------------|------------|------------------------------------------------------|------------|----------------|------------|
| Class                                               | Lower CI95 | Cum. Frequency | Upper CI95 | Class                                                | Lower CI95 | Cum. Frequency | Upper CI95 |
| 5                                                   | 0          | 0,0075         | 0,019      | 5                                                    | 0          | 0              | 0          |
| 10                                                  | 0,004      | 0,015          | 0,034      | 10                                                   | 0          | 0              | 0          |
| 15                                                  | 0,011      | 0,026          | 0,049      | 15                                                   | 0          | 0              | 0          |
| 20                                                  | 0,019      | 0,037          | 0,063      | 20                                                   | 0          | 0              | 0          |
| 25                                                  | 0,037      | 0,063          | 0,093      | 25                                                   | 0          | 0              | 0          |
| 30                                                  | 0,049      | 0,078          | 0,11       | 30                                                   | 0          | 0              | 0          |
| 35                                                  | 0,060      | 0,093          | 0,13       | 35                                                   | 0          | 0,011          | 0,028      |
| 40                                                  | 0,063      | 0,10           | 0,13       | 40                                                   | 0          | 0,017          | 0,039      |
| 45                                                  | 0,086      | 0,12           | 0,17       | 45                                                   | 0,0056     | 0,028          | 0,056      |
| 50                                                  | 0,12       | 0,16           | 0,21       | 50                                                   | 0,017      | 0,039          | 0,072      |
| 55                                                  | 0,15       | 0,19           | 0,24       | 55                                                   | 0,022      | 0,056          | 0,089      |
| 60                                                  | 0,19       | 0,24           | 0,29       | 60                                                   | 0,072      | 0,12           | 0,17       |
| 65                                                  | 0,26       | 0,31           | 0,37       | 65                                                   | 0,19       | 0,26           | 0,33       |
| 70                                                  | 0,34       | 0,40           | 0,47       | 70                                                   | 0,35       | 0,43           | 0,50       |
| 75                                                  | 0,51       | 0,57           | 0,63       | 75                                                   | 0,53       | 0,61           | 0,67       |
| 80                                                  | 0,66       | 0,71           | 0,76       | 80                                                   | 0,68       | 0,74           | 0,81       |
| 85                                                  | 0,78       | 0,82           | 0,87       | 85                                                   | 0,81       | 0,86           | 0,91       |
| 90                                                  | 1          | 1              | 1          | 90                                                   | 1,0        | 1,0            | 1,0        |

**A7r5 4 h stretched + 30 min stretched (n=157)**

| Class | Lower CI95 | Cum. Frequency | Upper CI95 |
|-------|------------|----------------|------------|
| 5     | 0,025      | 0,057          | 0,10       |
| 10    | 0,038      | 0,076          | 0,12       |
| 15    | 0,045      | 0,089          | 0,13       |
| 20    | 0,057      | 0,10           | 0,15       |
| 25    | 0,076      | 0,13           | 0,18       |
| 30    | 0,14       | 0,20           | 0,26       |
| 35    | 0,24       | 0,30           | 0,38       |
| 40    | 0,29       | 0,36           | 0,44       |
| 45    | 0,47       | 0,55           | 0,62       |
| 50    | 0,55       | 0,64           | 0,71       |
| 55    | 0,66       | 0,73           | 0,80       |
| 60    | 0,69       | 0,76           | 0,82       |
| 65    | 0,78       | 0,84           | 0,90       |
| 70    | 0,82       | 0,88           | 0,92       |
| 75    | 0,86       | 0,91           | 0,95       |
| 80    | 0,90       | 0,94           | 0,97       |
| 85    | 0,94       | 0,97           | 0,99       |
| 90    | 1          | 1              | 1          |

**A7r5 4 h stretched + 1 h stretched (n=175)**

| Class | Lower CI95 | Cum. Frequency | Upper CI95 |
|-------|------------|----------------|------------|
| 5     | 0,040      | 0,080          | 0,13       |
| 10    | 0,086      | 0,13           | 0,18       |
| 15    | 0,20       | 0,26           | 0,33       |
| 20    | 0,31       | 0,38           | 0,46       |
| 25    | 0,55       | 0,62           | 0,69       |
| 30    | 0,74       | 0,81           | 0,86       |
| 35    | 0,90       | 0,95           | 0,97       |
| 40    | 0,94       | 0,98           | 0,99       |
| 45    | 0,96       | 0,99           | 1          |
| 50    | 0,96       | 0,99           | 1          |
| 55    | 0,97       | 0,99           | 1          |
| 60    | 0,97       | 0,99           | 1          |
| 65    | 0,97       | 0,99           | 1          |
| 70    | 1          | 1              | 1          |
| 75    | 1          | 1              | 1          |
| 80    | 1          | 1              | 1          |
| 85    | 1          | 1              | 1          |
| 90    | 1          | 1              | 1          |

**A7r5 4 h stretched + 4 h stretched (n=285)**

| Class | Lower CI95 | Cum. Frequency | Upper CI95 |
|-------|------------|----------------|------------|
| 5     | 0,22       | 0,27           | 0,33       |
| 10    | 0,45       | 0,51           | 0,56       |
| 15    | 0,65       | 0,70           | 0,75       |
| 20    | 0,82       | 0,86           | 0,90       |
| 25    | 0,94       | 0,96           | 0,98       |
| 30    | 0,97       | 0,99           | 1          |
| 35    | 0,98       | 0,99           | 1          |
| 40    | 0,98       | 0,99           | 1          |
| 45    | 1          | 1              | 1          |
| 50    | 1          | 1              | 1          |
| 55    | 1          | 1              | 1          |
| 60    | 1          | 1              | 1          |
| 65    | 1          | 1              | 1          |
| 70    | 1          | 1              | 1          |
| 75    | 1          | 1              | 1          |
| 80    | 1          | 1              | 1          |
| 85    | 1          | 1              | 1          |
| 90    | 1          | 1              | 1          |

The lower and upper 95% confidence intervals were analyzed using the method for bias-corrected and accelerated bootstrap intervals. The number of bootstrap intervals was



set to 5000 for all histograms based on the indicated high number of cells (n). Cum. Frequency results from mean of upper and lower CI95.

**Table S8. Estimation of the 95% confidence intervals (CI95) for cumulative histograms in Fig. S3**

| <b>A7r5 unstretched 5 kPa (n=220)</b> |            |                |            | <b>A7r5 1 h stretched 5 kPa (n=281)</b> |            |                |            |
|---------------------------------------|------------|----------------|------------|-----------------------------------------|------------|----------------|------------|
| Class                                 | Lower CI95 | Cum. Frequency | Upper CI95 | Class                                   | Lower CI95 | Cum. Frequency | Upper CI95 |
| 5                                     | 0,018      | 0,041          | 0,068      | 5                                       | 0,057      | 0,085          | 0,12       |
| 10                                    | 0,045      | 0,077          | 0,12       | 10                                      | 0,060      | 0,089          | 0,12       |
| 15                                    | 0,082      | 0,12           | 0,17       | 15                                      | 0,060      | 0,089          | 0,12       |
| 20                                    | 0,14       | 0,18           | 0,24       | 20                                      | 0,060      | 0,093          | 0,13       |
| 25                                    | 0,17       | 0,22           | 0,28       | 25                                      | 0,078      | 0,11           | 0,15       |
| 30                                    | 0,21       | 0,26           | 0,33       | 30                                      | 0,089      | 0,12           | 0,16       |
| 35                                    | 0,23       | 0,29           | 0,35       | 35                                      | 0,10       | 0,13           | 0,17       |
| 40                                    | 0,29       | 0,35           | 0,41       | 40                                      | 0,12       | 0,16           | 0,21       |
| 45                                    | 0,38       | 0,44           | 0,50       | 45                                      | 0,15       | 0,20           | 0,24       |
| 50                                    | 0,47       | 0,54           | 0,60       | 50                                      | 0,21       | 0,26           | 0,31       |
| 55                                    | 0,53       | 0,60           | 0,66       | 55                                      | 0,27       | 0,32           | 0,38       |
| 60                                    | 0,61       | 0,68           | 0,74       | 60                                      | 0,33       | 0,38           | 0,44       |
| 65                                    | 0,67       | 0,73           | 0,79       | 65                                      | 0,36       | 0,42           | 0,48       |
| 70                                    | 0,71       | 0,76           | 0,82       | 70                                      | 0,43       | 0,48           | 0,54       |
| 75                                    | 0,75       | 0,80           | 0,85       | 75                                      | 0,52       | 0,57           | 0,63       |
| 80                                    | 0,77       | 0,83           | 0,87       | 80                                      | 0,63       | 0,69           | 0,74       |
| 85                                    | 0,85       | 0,90           | 0,93       | 85                                      | 0,75       | 0,80           | 0,84       |
| 90                                    | 1          | 1              | 1          | 90                                      | 1          | 1              | 1          |

The lower and upper 95% confidence intervals were analyzed using the method for bias-corrected and accelerated bootstrap intervals. The number of bootstrap intervals was set to 5000 for all histograms based on the indicated high number of cells (n). Cum. Frequency results from mean of upper and lower CI95.

**Supplementary Figure S1:** RhoA activation in A7r5 cells is neither enhancing actin fibers nor focal adhesions, therefore consequently not strongly amplifying actin reorientation. (A) Micrographs of A7r5 cells immune stained for actin (magenta) and paxillin (green) after 30 min treatment with LPA. Scale bar is 50  $\mu\text{m}$ . (B) Actin reorientation of A7r5 cells after 30 min, 1 h and 4 h of cyclic stretch after 30 min pre-treatment with LPA in serum free medium. Control cells were cultivated in serum free medium for 4.5 h. After fixation and staining the angular distributions of actin fibers were evaluated from  $0^\circ$  to  $90^\circ$  to the direction of stretch, cumulative frequency plots are given ( $n_a = 160$ ,  $n_b = 138$ ,  $n_c = 148$ ,  $n_d = 147$ ,  $n_e = 142$ ,  $n_f = 158$ ,  $n_g = 173$ ,  $n_h = 155$ ,  $n_i = 160$ ).

**Supplementary Figure S2:** Reorientation of actin stress fibers in A7r5 cells is not stable after stretch release and can be inverted after second cyclic stretch in orthogonal direction. (A) Immunofluorescent micrographs of actin cytoskeleton after 4 h cyclic stretch (4 h str.) followed by 4 hours incubation without stretch (4 h str. + 4 h unstr.) or followed by 4 hours additional cyclic stretch in orthogonal direction (4 h str. + 4 h str.). Control cells were cultivated unstretched (unstr.). Arrowheads illustrate stretch directions. Scale bar is 50  $\mu\text{m}$ . (B) After fixation and staining, actin stress fibers were evaluated as angular distribution from  $0^\circ$  to  $90^\circ$  to the direction of the first stretch for all samples and plotted as cumulative frequencies of all analyzed cells ( $n$ ). ( $n_a = 299$ ,  $n_b = 292$ ,  $n_c = 268$ ,  $n_d = 285$ ).

**Supplementary Figure S3:** Actin reorientation and LC3B-spots in A7r5 cells can be likewise induced by uniaxial cyclic stretch on softer 5 kPa elastomer substrates. (A) Immunofluorescent micrographs of actin cytoskeleton after 1 h of cyclic stretch on 5 kPa elastomer substrates. Scale bar is 50  $\mu\text{m}$ . (B) After fixation and staining, actin stress fiber orientations were evaluated as angular distribution from  $0^\circ$  to  $90^\circ$  relative to the direction of stretch and plotted as cumulative frequencies of all analyzed cells ( $n$ ). ( $n_a = 220$ ,  $n_b = 281$ ). (C) LC3B (green) immune stainings of unstretched (unstr.) and 1 h cyclically stretched (1 h str.) A7r5 cells cultivated on 5 kPa elastomeric substrates. Scale bar is 20  $\mu\text{m}$ . (D) Quantification of LC3B-spots per cell shown in (C) in percent of unstretched control. Data represent mean  $\pm$  S.E.M. of all analyzed cells ( $n$ ) ( $n_c = 58$ ,  $n_d = 52$ ).

**Supplementary Figure S4:** Workflow of LC3B-spots analysis.

For LC3B-spot analysis cells were immunocytochemically stained against the autophagosomal marker protein LC3B (A). Subsequently, autophagosomes were recorded by of single cells were performed using appropriate settings for excitation and emission. All cells were imaged completely from bottom to top with an optical layer thickness of 159 nm and a layer overlap of 50% based on optimal z-resolution settings in the Zen Black software (Carl Zeiss). Airyscan images were processed with the same software. For image processing, images were smoothed using a Gaussian filter (sigma size 1 pixel) and a cell mask was calculated. Therefore, images were binarized using the mean gray value of the image as a threshold. All values above the threshold were defined as cell mask. This mask

was then post processed by binary closing (disk structuring element with a radius of 10 pixels) and filling of cell mask holes with an area less than 10,000 pixels. To detect functional LC3-spots within the LC3B signal a manually selected threshold was kept constant for each single experiment to separate LC3B-spots from background signal (B). Threshold was typically at least 1.5 fold above average image gray value. All spots with an area of less than 70 pixels for A7r5 and 20 pixels for MEF cells were rejected (C). Signals outside the cell mask (shown by the red line in D) were not counted either. To separate big clusters of spots we used the watershed algorithm. For this purpose a distance transformation of the spot mask was calculated. Local maxima with a minimum distance of at least 5 pixels were detected and used as markers for the watershed algorithm to separate large clusters of spots. The number of remaining spots was then counted as LC3B-spots per cell for further analysis.

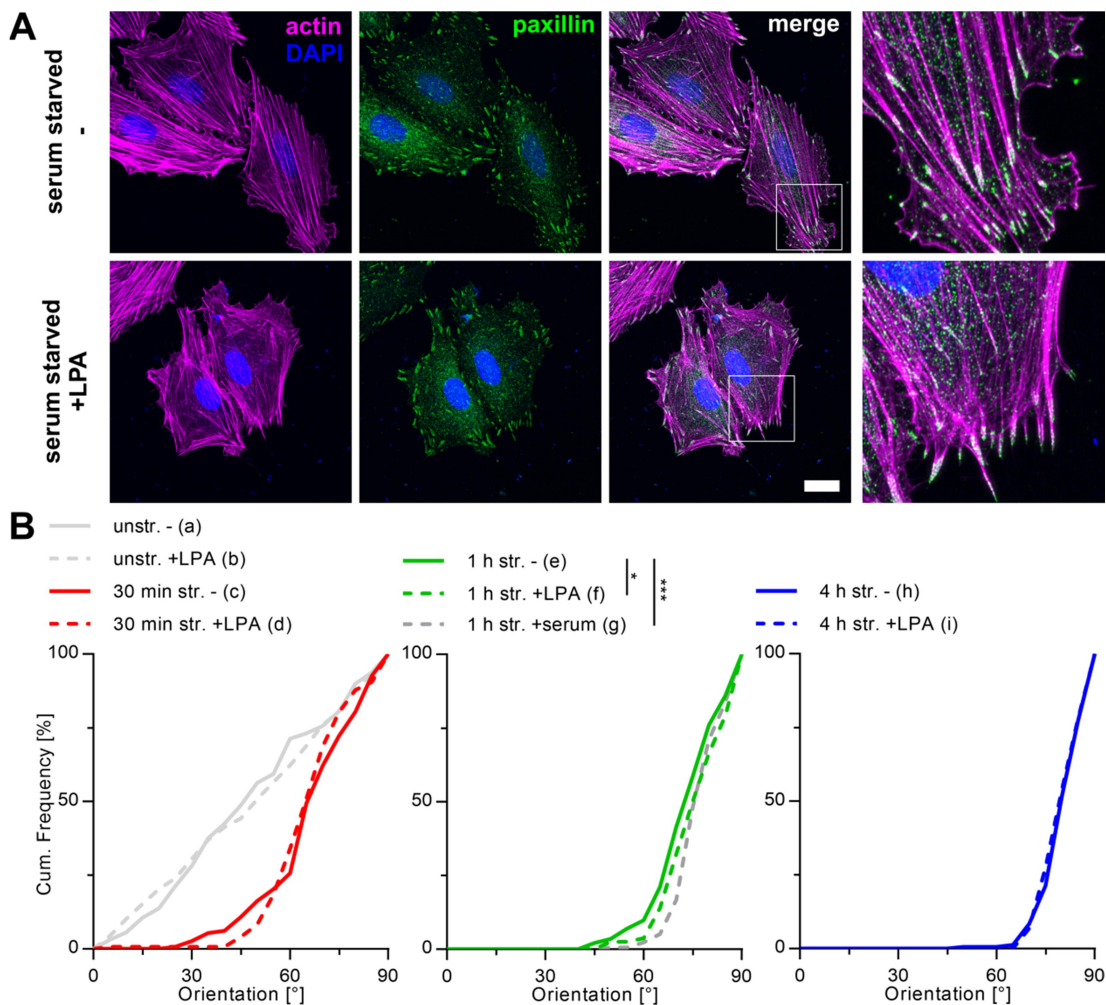

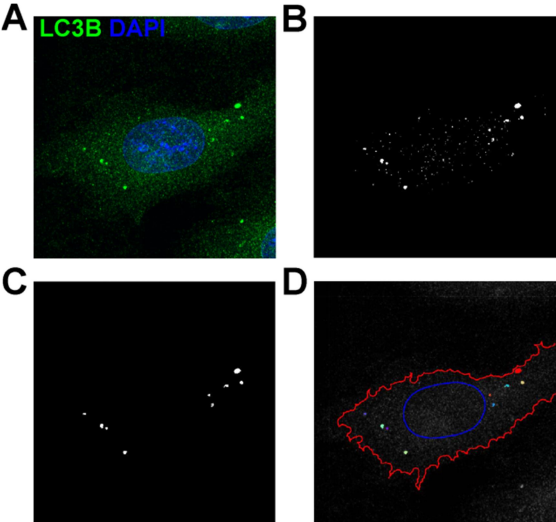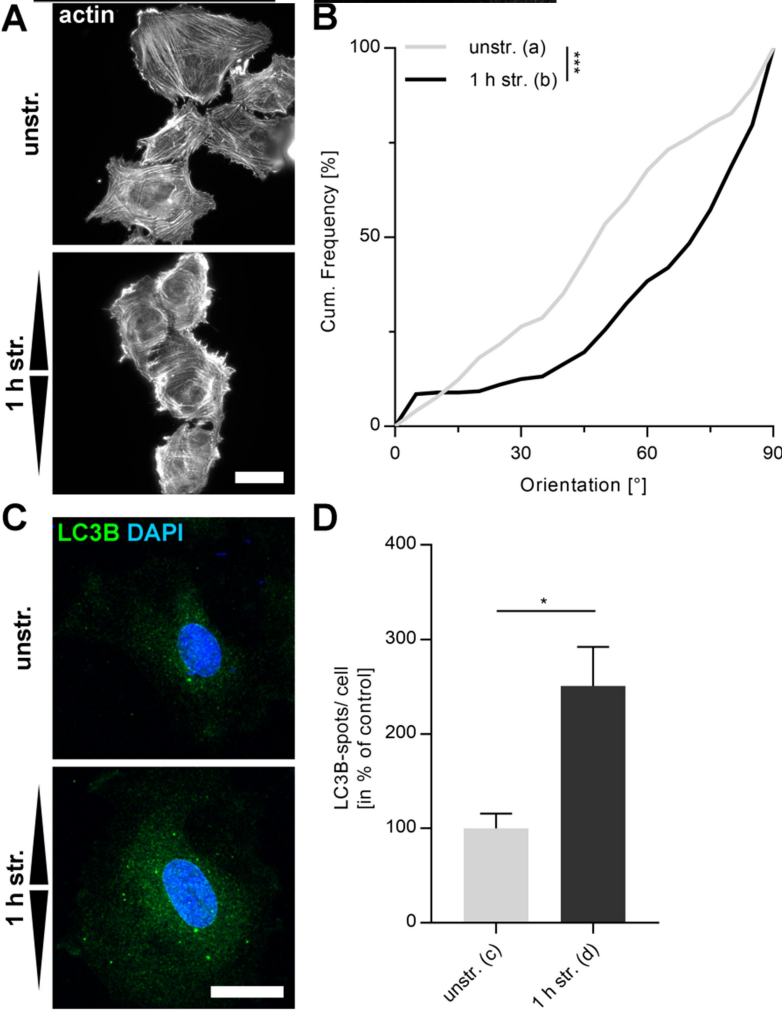

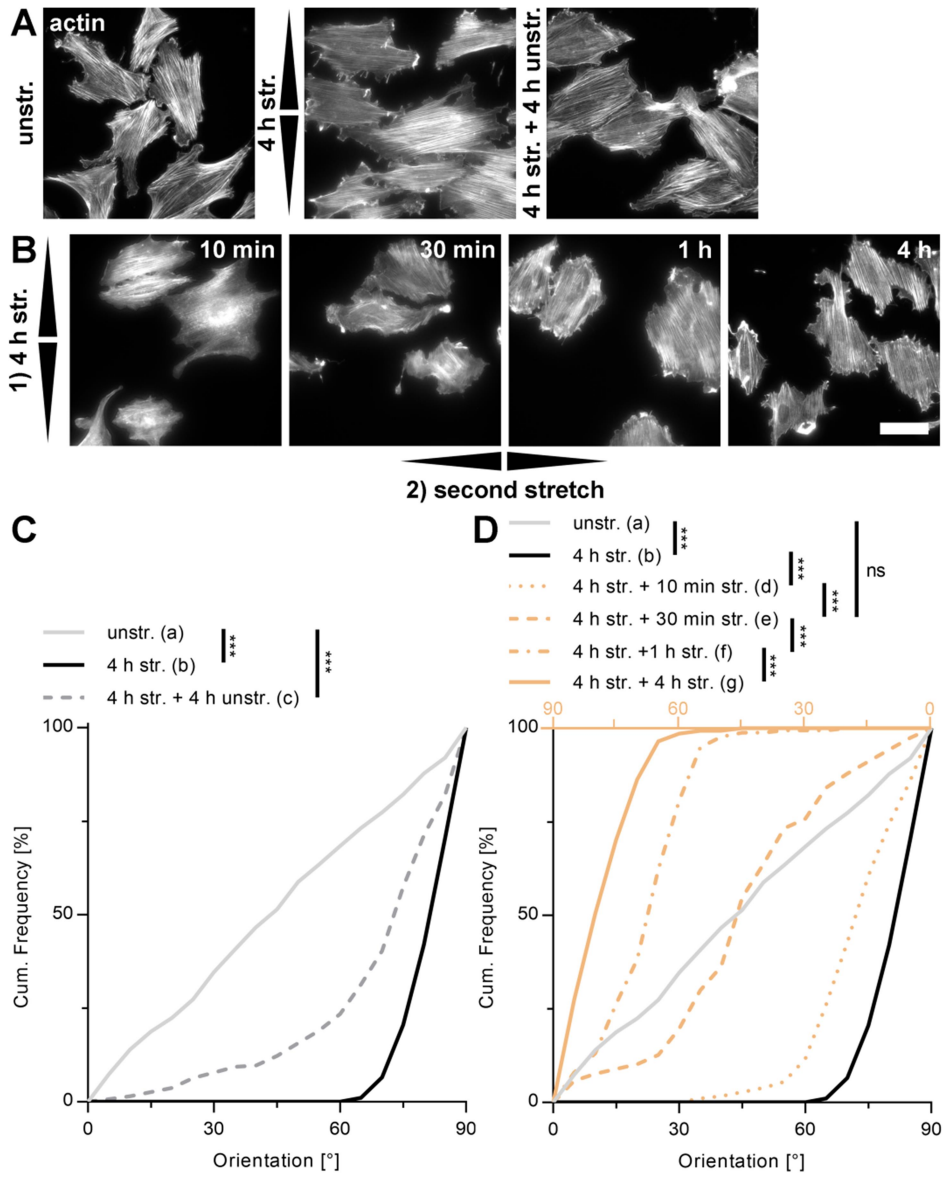

Supplement: mbc-32-ar9-s001.pdf [file mbc-32-ar9-s001.pdf]
